# Supplementary material for: Discovery of pyrazole-based analogs as CDK2 inhibitors with apoptotic-inducing activity: design, synthesis and molecular dynamics study
Source: Royal Society of Chemistry journal article supplement (doi:10.1039/d4ra06500j), 2024-01-01

## Supplementary:

### Supplementary material index:

- S1: Table of relative activity of the synthesized compounds
- S2: Dose response curve of compound **4** at five dose assay against all cell lines at NCI
- S3: Summary of five doses results of compound **4** from NCI
- S4: Total energy versus time (production step) for the free protein
- S5: Total energy versus time (production step) for compounds **AT7519 (I)**, **4**, **7c** and **9**
- S6: RMSD free protein
- S7: RMSD compounds **AT7519 (I)**, **4**, **7c** and **9**
- S8: RMSF free protein
- S9: RMSF compounds **AT7519 (I)**, **4**, **7c** and **9**
- S10: <sup>1</sup>H-NMR of compound **2a**
- S11: <sup>13</sup>C-NMR of compound **2a**
- S12: <sup>1</sup>H-NMR of compound **2b**
- S13: <sup>13</sup>C-NMR of compound **2b**
- S14: <sup>1</sup>H-NMR of compound **2c**
- S15: <sup>13</sup>C-NMR of compound **2c**
- S16: <sup>1</sup>H-NMR of compound **2d**
- S17: <sup>13</sup>C-NMR of compound **2d**
- S18: <sup>1</sup>H-NMR of compound **2e**
- S19: <sup>13</sup>C-NMR of compound **2e**
- S20: <sup>1</sup>H-NMR of compound **2f**
- S21: <sup>13</sup>C-NMR of compound **2f**
- S22: <sup>1</sup>H-NMR of compound **2g**
- S23: <sup>13</sup>C-NMR of compound **2g**
- S24: <sup>1</sup>H-NMR of compound **4**
- S25: <sup>13</sup>C-NMR of compound **4**
- S26: <sup>1</sup>H-NMR of compound **7a**
- S27: <sup>13</sup>C-NMR of compound **7a**
- S28: <sup>1</sup>H-NMR of compound **7b**
- S29: <sup>13</sup>C-NMR of compound **7b**
- S30: <sup>1</sup>H-NMR of compound **7c**
- S31: <sup>13</sup>C-NMR of compound **7c**
- S32: <sup>1</sup>H-NMR of compound **7d**
- S33: <sup>13</sup>C-NMR of compound **7d**
- S34: <sup>1</sup>H-NMR of compound **8a**
- S35: <sup>13</sup>C-NMR of compound **8a**
- S36: <sup>1</sup>H-NMR of compound **8b**
- S37: <sup>1</sup>H-NMR of compound **9**
- S38: <sup>13</sup>C-NMR of compound **9**
- S39: <sup>1</sup>H-NMR of compound **10**
- S40: <sup>13</sup>C-NMR of compound **10**

S41: IR of compound **2a**  
S42: IR of compound **2b**  
S43: IR of compound **2e**  
S44: IR of compound **2f**  
S45: IR of compound **2g**  
S46: Inhibition of CDK2/CyclinA2 by compounds **2a-g, 4, 7a-d, 8a-b, 9 &10** at 50  $\mu$ M.  
S47: The dose–response curves show the Inhibitory Concentration at 50% (IC<sub>50</sub>) curves of compounds **4, 7c, 7d, 8b and 9** in CDK2/Cyclin A2 protein kinase activity assay.  
S48: Flow cytometric analysis for cell cycle distribution. (A) Control HCT-116, (B) Compound **4**, and (C) graphical representation for cell cycle distribution analysis among differently treated cells.  
S49: Flow cytometric analysis of apoptosis among treated cells. (A) Control HCT-116, (B) Compound **4**, (C) Graphical illustration of apoptosis % among differently treated cells.  
S50: Cell cycle and apoptosis raw data  
S51: Western Blot assay for compounds **4, 9**  
S52: Mass Results compound **4**  
S53: Mass Results compound **7d**  
S54: Mass results compound **8a**  
S55: Mass Results compound **9**  
S56: Mass Results compound **10**

S1 Table of relative activity of the synthesized compounds

| Sample no. | Relative activity |
|------------|-------------------|
| 2a         | 51.4              |
| 2b         | 55.6              |
| 2c         | 59.3              |
| 2d         | 40.2              |
| 2e         | 56.6              |
| 2f         | 62.1              |
| 2g         | 59.5              |
| 4          | 24.7              |
| 7a         | 42.3              |
| 7b         | 70.7              |
| 7c         | 68.6              |
| 7d         | 11.5              |
| 8a         | 56.4              |
| 8b         | 27.1              |
| 9          | 14.5              |
| 10         | 49.9              |
| DMSO       | 100               |

S2: Dose response curve of compound 4 at five dose assay against all cell lines at NCI

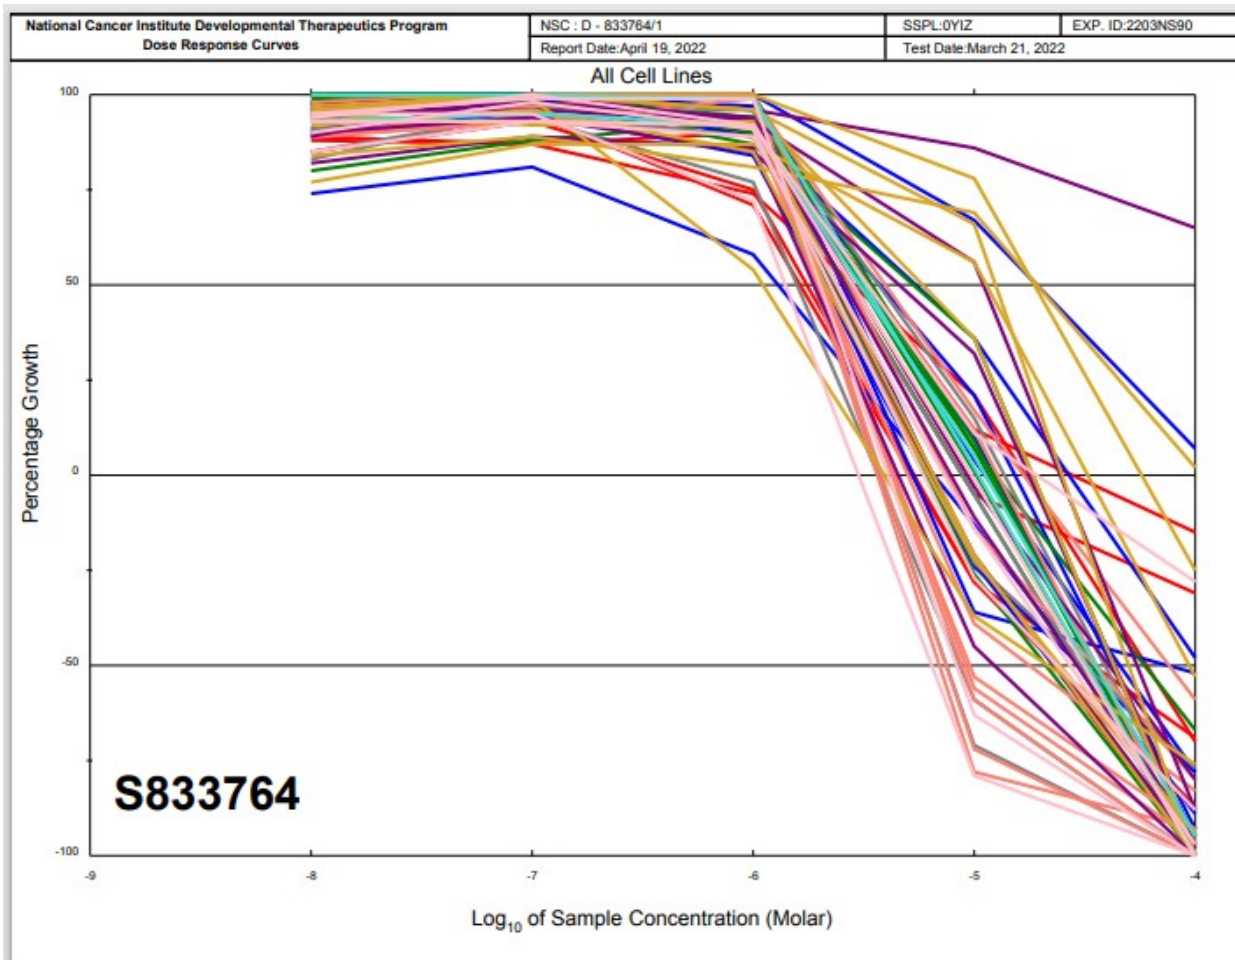

S3: Summary of five doses results of compound 4 from NCI

| National Cancer Institute Developmental Therapeutics Program<br>In-Vitro Testing Results |       |                        |       |       |                                       |       |        |                |      |                |      |      |               |           |           |
|------------------------------------------------------------------------------------------|-------|------------------------|-------|-------|---------------------------------------|-------|--------|----------------|------|----------------|------|------|---------------|-----------|-----------|
| NSC : D - 833764 / 1                                                                     |       |                        |       |       | Experiment ID : 2203NS90              |       |        |                |      | Test Type : 08 |      |      | Units : Molar |           |           |
| Report Date : April 19, 2022                                                             |       |                        |       |       | Test Date : March 21, 2022            |       |        |                |      | QNS :          |      |      | MC :          |           |           |
| COMI : h                                                                                 |       |                        |       |       | Stain Reagent : SRB Dual-Pass Related |       |        |                |      | SSPL 0YIZ      |      |      |               |           |           |
| Log10 Concentration                                                                      |       |                        |       |       |                                       |       |        |                |      |                |      |      |               |           |           |
| Panel/Cell Line                                                                          | Time  | Mean Optical Densities |       |       |                                       |       |        | Percent Growth |      |                |      |      | GI50          | TGI       | LC50      |
|                                                                                          |       | Zero                   | Ctrl  | -8.0  | -7.0                                  | -6.0  | -5.0   | -4.0           | -8.0 | -7.0           | -6.0 | -5.0 |               |           |           |
| <b>Leukemia</b>                                                                          |       |                        |       |       |                                       |       |        |                |      |                |      |      |               |           |           |
| CCRFB-CEM                                                                                | 1.043 | 3.064                  | 3.018 | 3.061 | 2.854                                 | 0.994 | 0.716  | 98             | 100  | 90             | -5   | -31  | 2.63E-6       | 8.92E-6   | > 1.00E-4 |
| HL-60(TB)                                                                                | 0.485 | 1.427                  | 1.326 | 1.309 | 1.185                                 | 0.684 | 0.146  | 89             | 87   | 74             | 21   | -70  | 2.86E-6       | 1.71E-5   | 6.05E-5   |
| K-562                                                                                    | 0.270 | 1.741                  | 1.571 | 1.548 | 1.599                                 | 0.211 | -0.068 | 88             | 87   | 90             | -22  | -100 | 2.29E-6       | 6.37E-6   | 2.28E-5   |
| MOLT-4                                                                                   | 0.690 | 2.430                  | 2.352 | 2.350 | 1.928                                 | 0.499 | 0.216  | 96             | 95   | 71             | -28  | -69  | 1.64E-6       | 5.24E-6   | 3.49E-5   |
| RPMI-8226                                                                                | 0.822 | 2.690                  | 2.705 | 2.714 | 2.537                                 | 1.053 | 0.698  | 101            | 101  | 92             | 12   | -15  | 3.36E-6       | 2.82E-5   | > 1.00E-4 |
| SR                                                                                       | 0.440 | 1.625                  | 1.444 | 1.545 | 1.326                                 | 0.317 | 0.058  | 85             | 93   | 75             | -28  | -87  | 1.74E-6       | 5.33E-6   | 2.36E-5   |
| <b>Non-Small Cell Lung Cancer</b>                                                        |       |                        |       |       |                                       |       |        |                |      |                |      |      |               |           |           |
| A549/ATCC                                                                                | 0.329 | 1.692                  | 1.690 | 1.806 | 1.690                                 | 1.247 | 0.430  | 100            | 108  | 100            | 67   | 7    | 1.94E-5       | > 1.00E-4 | > 1.00E-4 |
| EKVX                                                                                     | 0.814 | 1.567                  | 1.555 | 1.580 | 1.483                                 | 1.084 | 0.427  | 98             | 102  | 89             | 36   | -48  | 5.39E-6       | 2.69E-5   | > 1.00E-4 |
| HOP-62                                                                                   | 0.727 | 2.254                  | 2.115 | 2.171 | 2.003                                 | 0.554 | 0.159  | 91             | 95   | 84             | -24  | -78  | 2.05E-6       | 6.00E-6   | 3.03E-5   |
| HOP-92                                                                                   | 1.287 | 1.716                  | 1.603 | 1.632 | 1.537                                 | 1.118 | 0.143  | 74             | 81   | 58             | -13  | -89  | 1.30E-6       | 6.55E-6   | 3.07E-5   |
| NCI-H226                                                                                 | 0.741 | 2.104                  | 2.044 | 2.135 | 2.013                                 | 0.878 | -0.042 | 96             | 102  | 93             | 10   | -100 | 3.31E-6       | 1.23E-5   | 3.51E-5   |
| NCI-H23                                                                                  | 0.509 | 1.650                  | 1.702 | 1.708 | 1.644                                 | 0.394 | 0.011  | 105            | 105  | 99             | -23  | -98  | 2.54E-6       | 6.53E-6   | 2.31E-5   |
| NCI-H322M                                                                                | 0.962 | 2.473                  | 2.511 | 2.462 | 2.308                                 | 1.273 | 0.069  | 103            | 99   | 89             | 21   | -93  | 3.72E-6       | 1.52E-5   | 4.19E-5   |
| NCI-H460                                                                                 | 0.248 | 2.503                  | 2.543 | 2.568 | 2.445                                 | 0.334 | 0.054  | 102            | 103  | 97             | 4    | -78  | 3.21E-6       | 1.11E-5   | 4.53E-5   |
| NCI-H522                                                                                 | 0.913 | 2.572                  | 2.393 | 2.522 | 2.466                                 | 0.582 | 0.439  | 89             | 97   | 94             | -36  | -52  | 2.17E-6       | 5.25E-6   | 7.48E-5   |
| <b>Colon Cancer</b>                                                                      |       |                        |       |       |                                       |       |        |                |      |                |      |      |               |           |           |
| COLO 205                                                                                 | 0.481 | 1.784                  | 1.801 | 1.851 | 1.708                                 | 0.592 | -0.049 | 101            | 105  | 94             | 9    | -100 | 3.28E-6       | 1.20E-5   | 3.46E-5   |
| HCC-2998                                                                                 | 0.450 | 1.760                  | 1.499 | 1.606 | 1.662                                 | 0.335 | -0.232 | 80             | 88   | 93             | -26  | -100 | 2.29E-6       | 6.08E-6   | 2.13E-5   |
| HCT-116                                                                                  | 0.248 | 2.090                  | 2.047 | 2.158 | 2.008                                 | 0.270 | -0.019 | 98             | 104  | 96             | 1    | -100 | 3.04E-6       | 1.03E-5   | 3.20E-5   |
| HCT-15                                                                                   | 0.159 | 0.999                  | 0.993 | 0.979 | 0.888                                 | 0.461 | -0.024 | 99             | 98   | 87             | 36   | -100 | 5.29E-6       | 1.84E-5   | 4.29E-5   |
| HT29                                                                                     | 0.205 | 1.302                  | 1.307 | 1.490 | 1.341                                 | 0.280 | -0.071 | 100            | 117  | 104            | 7    | -100 | 3.58E-6       | 1.16E-5   | 3.40E-5   |
| KM12                                                                                     | 0.483 | 2.454                  | 2.409 | 2.477 | 2.261                                 | 0.461 | -0.058 | 98             | 101  | 90             | -5   | -100 | 2.66E-6       | 8.95E-6   | 2.99E-5   |
| SW-620                                                                                   | 0.332 | 2.569                  | 2.603 | 2.615 | 2.414                                 | 0.497 | 0.109  | 102            | 102  | 93             | 7    | -67  | 3.18E-6       | 1.26E-5   | 5.88E-5   |
| <b>CNS Cancer</b>                                                                        |       |                        |       |       |                                       |       |        |                |      |                |      |      |               |           |           |
| SF-268                                                                                   | 0.752 | 2.403                  | 2.151 | 2.314 | 2.214                                 | 0.580 | 0.171  | 85             | 95   | 89             | -23  | -77  | 2.22E-6       | 6.23E-6   | 3.15E-5   |
| SF-295                                                                                   | 0.519 | 1.680                  | 1.487 | 1.631 | 1.630                                 | 0.690 | 0.025  | 83             | 96   | 96             | 15   | -95  | 3.67E-6       | 1.36E-5   | 3.87E-5   |
| SF-539                                                                                   | 0.682 | 2.085                  | 1.925 | 2.008 | 1.764                                 | 0.278 | -0.093 | 89             | 94   | 77             | -59  | -100 | 1.58E-6       | 3.68E-6   | 8.56E-6   |
| SNB-19                                                                                   | 0.825 | 2.472                  | 2.329 | 2.369 | 2.293                                 | 0.780 | -0.161 | 91             | 94   | 89             | -5   | -100 | 2.59E-6       | 8.76E-6   | 2.96E-5   |
| U251                                                                                     | 0.313 | 1.619                  | 1.551 | 1.686 | 1.565                                 | 0.092 | -0.072 | 95             | 105  | 96             | -71  | -100 | 1.88E-6       | 3.76E-6   | 7.51E-6   |
| <b>Melanoma</b>                                                                          |       |                        |       |       |                                       |       |        |                |      |                |      |      |               |           |           |
| LOX IMVI                                                                                 | 0.298 | 2.411                  | 2.369 | 2.446 | 2.479                                 | 0.123 | -0.058 | 98             | 102  | 103            | -59  | -100 | 2.13E-6       | 4.33E-6   | 8.81E-6   |
| MALME-3M                                                                                 | 0.702 | 1.338                  | 1.268 | 1.321 | 1.348                                 | 0.199 | 0.002  | 89             | 97   | 102            | -72  | -100 | 1.98E-6       | 3.86E-6   | 7.49E-6   |
| M14                                                                                      | 0.470 | 1.753                  | 1.657 | 1.770 | 1.793                                 | 0.403 | 0.096  | 93             | 101  | 103            | -14  | -80  | 2.83E-6       | 7.55E-6   | 3.51E-5   |
| MDA-MB-435                                                                               | 0.594 | 2.799                  | 2.575 | 2.761 | 2.603                                 | 0.364 | 0.099  | 90             | 98   | 91             | -39  | -83  | 2.07E-6       | 5.03E-6   | 1.78E-5   |
| SK-MEL-2                                                                                 | 1.108 | 2.591                  | 2.569 | 2.653 | 2.606                                 | 0.483 | 0.042  | 98             | 104  | 101            | -56  | -96  | 2.11E-6       | 4.38E-6   | 9.10E-6   |
| SK-MEL-28                                                                                | 0.742 | 2.181                  | 2.126 | 2.305 | 2.178                                 | 0.167 | 0.051  | 96             | 109  | 100            | -78  | -93  | 1.91E-6       | 3.65E-6   | 6.99E-6   |
| SK-MEL-5                                                                                 | 0.777 | 2.827                  | 2.718 | 2.835 | 2.648                                 | 1.024 | -0.162 | 95             | 100  | 91             | 12   | -100 | 3.32E-6       | 1.28E-5   | 3.58E-5   |
| UACC-257                                                                                 | 1.043 | 2.587                  | 2.423 | 2.486 | 2.574                                 | 1.306 | 0.425  | 89             | 93   | 99             | 17   | -59  | 3.97E-6       | 1.67E-5   | 7.55E-5   |
| UACC-62                                                                                  | 0.696 | 2.421                  | 2.238 | 2.293 | 2.290                                 | 0.330 | 0.051  | 89             | 93   | 92             | -53  | -93  | 1.96E-6       | 4.34E-6   | 9.60E-6   |
| <b>Ovarian Cancer</b>                                                                    |       |                        |       |       |                                       |       |        |                |      |                |      |      |               |           |           |
| IGROV1                                                                                   | 0.550 | 2.438                  | 2.257 | 2.327 | 2.149                                 | 1.146 | 0.018  | 90             | 94   | 85             | 32   | -97  | 4.50E-6       | 1.76E-5   | 4.32E-5   |
| OVCAR-3                                                                                  | 0.365 | 1.636                  | 1.410 | 1.491 | 1.452                                 | 0.202 | -0.083 | 82             | 89   | 86             | -45  | -100 | 1.87E-6       | 4.54E-6   | 1.25E-5   |
| OVCAR-4                                                                                  | 0.612 | 1.772                  | 1.699 | 1.753 | 1.704                                 | 0.592 | 0.123  | 94             | 98   | 94             | -3   | -80  | 2.84E-6       | 9.26E-6   | 4.07E-5   |
| OVCAR-5                                                                                  | 0.554 | 1.673                  | 1.615 | 1.630 | 1.594                                 | 1.179 | 0.064  | 95             | 96   | 93             | 56   | -88  | 1.10E-5       | 2.44E-5   | 5.42E-5   |
| OVCAR-8                                                                                  | 0.348 | 1.795                  | 1.746 | 1.864 | 1.698                                 | 0.309 | 0.018  | 97             | 105  | 93             | -11  | -95  | 2.59E-6       | 7.81E-6   | 2.90E-5   |
| NCI/ADR-RES                                                                              | 0.585 | 2.189                  | 2.141 | 2.210 | 2.119                                 | 1.959 | 1.627  | 97             | 101  | 96             | 86   | 65   | > 1.00E-4     | > 1.00E-4 | > 1.00E-4 |
| SK-OV-3                                                                                  | 0.924 | 1.958                  | 1.847 | 1.979 | 1.872                                 | 0.727 | 0.022  | 89             | 102  | 92             | -21  | -98  | 2.34E-6       | 6.47E-6   | 2.37E-5   |
| <b>Renal Cancer</b>                                                                      |       |                        |       |       |                                       |       |        |                |      |                |      |      |               |           |           |
| 786-0                                                                                    | 0.653 | 2.376                  | 2.239 | 2.305 | 2.126                                 | 0.511 | 0.041  | 92             | 96   | 85             | -22  | -94  | 2.14E-6       | 6.27E-6   | 2.47E-5   |
| A498                                                                                     | 1.761 | 2.578                  | 2.391 | 2.475 | 2.475                                 | 2.218 | 0.836  | 77             | 87   | 87             | 56   | -53  | 1.14E-5       | 3.28E-5   | 9.47E-5   |
| ACHN                                                                                     | 0.437 | 1.705                  | 1.626 | 1.751 | 1.653                                 | 0.898 | -0.127 | 94             | 104  | 96             | 36   | -100 | 5.90E-6       | 1.85E-5   | 4.30E-5   |
| CAKI-1                                                                                   | 0.751 | 2.386                  | 2.329 | 2.426 | 2.314                                 | 1.837 | -0.026 | 96             | 102  | 96             | 66   | -100 | 1.25E-5       | 2.51E-5   | 5.01E-5   |
| RXF 393                                                                                  | 1.039 | 1.583                  | 1.598 | 1.580 | 1.331                                 | 0.650 | 0.247  | 103            | 99   | 54             | -37  | -76  | 1.10E-6       | 3.88E-6   | 2.11E-5   |
| SN12C                                                                                    | 0.440 | 1.727                  | 1.658 | 1.630 | 1.631                                 | 0.350 | -0.140 | 95             | 92   | 93             | -21  | -100 | 2.38E-6       | 6.58E-6   | 2.35E-5   |
| TK-10                                                                                    | 1.040 | 1.969                  | 1.943 | 1.986 | 1.975                                 | 1.761 | 0.777  | 97             | 102  | 101            | 78   | -25  | 1.86E-5       | 5.68E-5   | > 1.00E-4 |
| UO-31                                                                                    | 0.717 | 2.277                  | 2.028 | 2.103 | 1.986                                 | 1.800 | 0.747  | 84             | 89   | 81             | 69   | 2    | 1.94E-5       | > 1.00E-4 | > 1.00E-4 |
| <b>Prostate Cancer</b>                                                                   |       |                        |       |       |                                       |       |        |                |      |                |      |      |               |           |           |
| PC-3                                                                                     | 0.592 | 2.296                  | 2.178 | 2.220 | 2.162                                 | 0.684 | 0.033  | 93             | 95   | 92             | 5    | -95  | 3.06E-6       | 1.13E-5   | 3.58E-5   |
| DU-145                                                                                   | 0.401 | 1.793                  | 1.799 | 1.872 | 1.785                                 | 0.425 | -0.215 | 100            | 106  | 99             | 2    | -100 | 3.21E-6       | 1.04E-5   | 3.22E-5   |
| <b>Breast Cancer</b>                                                                     |       |                        |       |       |                                       |       |        |                |      |                |      |      |               |           |           |
| MCF7                                                                                     | 0.656 | 2.780                  | 2.634 | 2.639 | 2.547                                 | 0.566 | 0.022  | 93             | 93   | 89             | -14  | -97  | 2.40E-6       | 7.34E-6   | 2.74E-5   |
| MDA-MB-231/ATCC                                                                          | 0.580 | 1.470                  | 1.423 | 1.464 | 1.458                                 | 0.213 | -0.198 | 95             | 99   | 99             | -63  | -100 | 2.00E-6       | 4.07E-6   | 8.28E-6   |
| HS 578T                                                                                  | 1.456 | 2.946                  | 2.724 | 2.849 | 2.827                                 | 1.622 | 1.053  | 85             | 93   | 92             | 11   | -28  | 3.31E-6       | 1.94E-5   | > 1.00E-4 |
| BT-549                                                                                   | 1.070 | 1.879                  | 1.829 | 1.921 | 1.818                                 | 1.055 | -0.206 | 94             | 105  | 92             | -1   | -100 | 2.83E-6       | 9.66E-6   | 3.11E-5   |
| T-47D                                                                                    | 0.806 | 1.883                  | 1.772 | 1.864 | 1.781                                 | 0.591 | 0.094  | 90             | 98   | 91             | -27  | -88  | 2.22E-6       | 5.92E-6   | 2.39E-5   |

S4: Total energy versus time (production step) for the free protein

**Total Energy vs Time (Production step)**

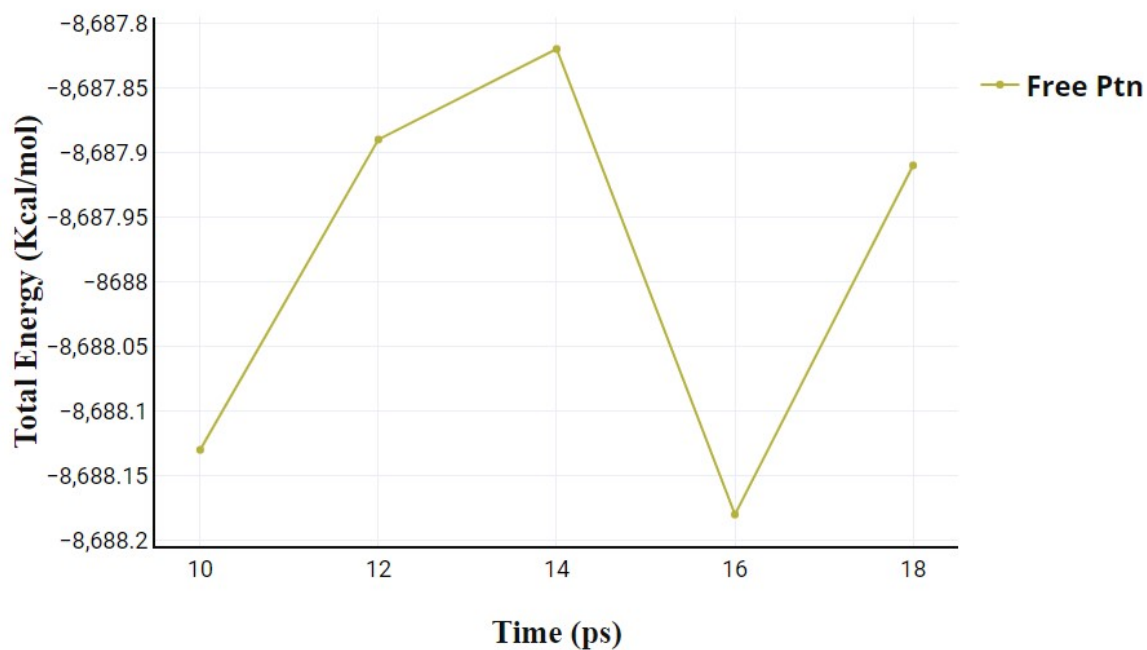

S5: Total energy versus time (production step) for compounds AT7519 (I), 4, 7a, and 9

**Total Energy vs Time (Production step)**

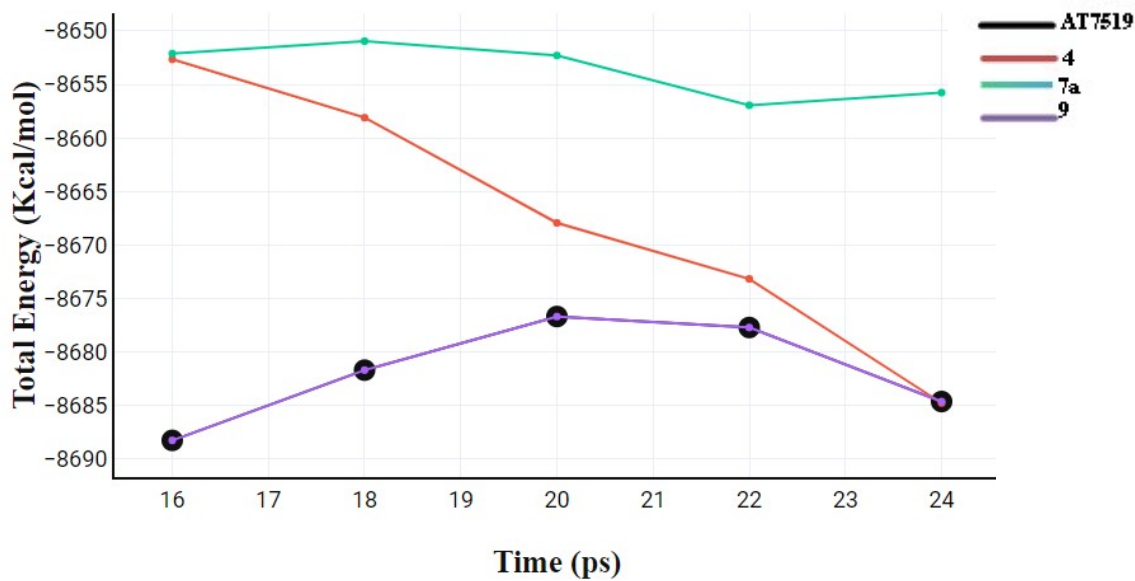

S6: RMSD free protein

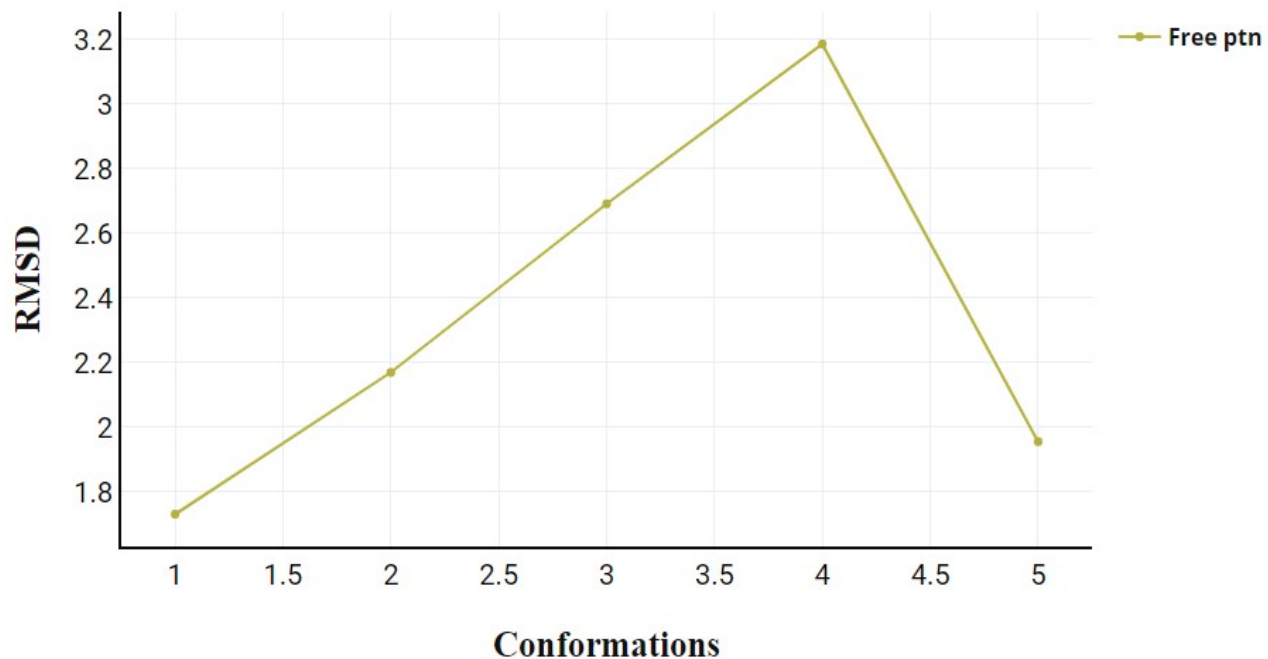

S7: RMSD compounds AT7519 (I), 4, 7a and 9

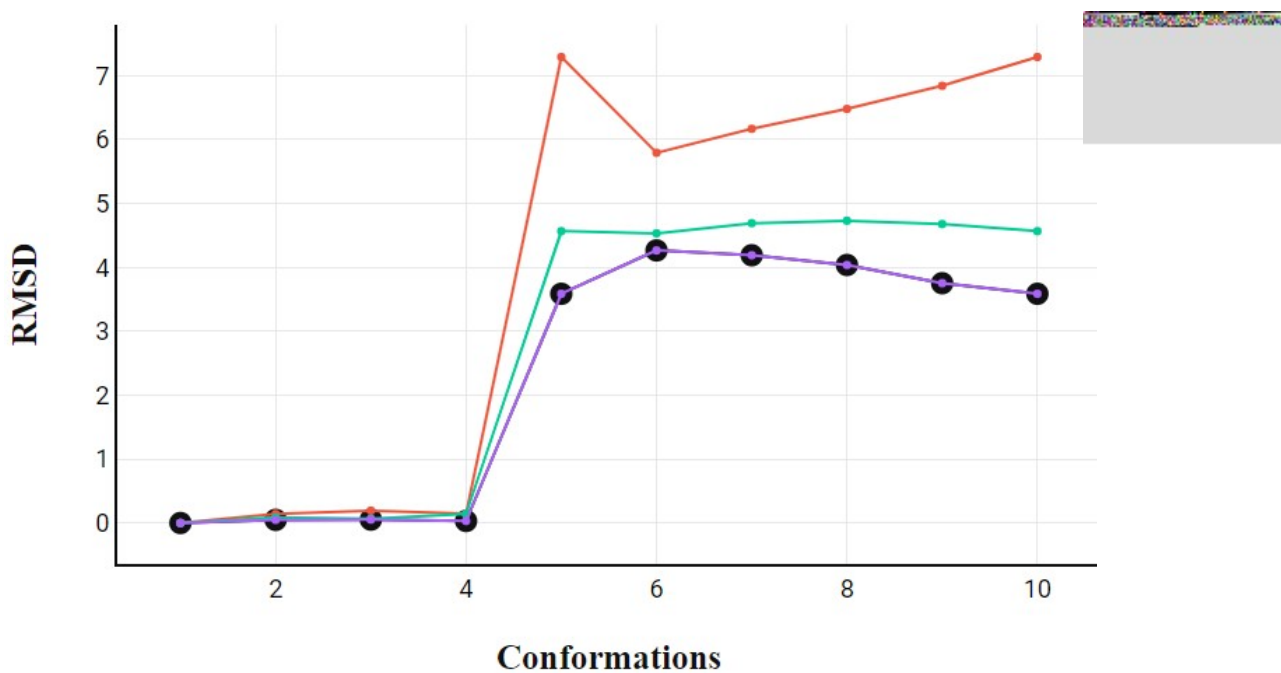

S8: RMSF free protein

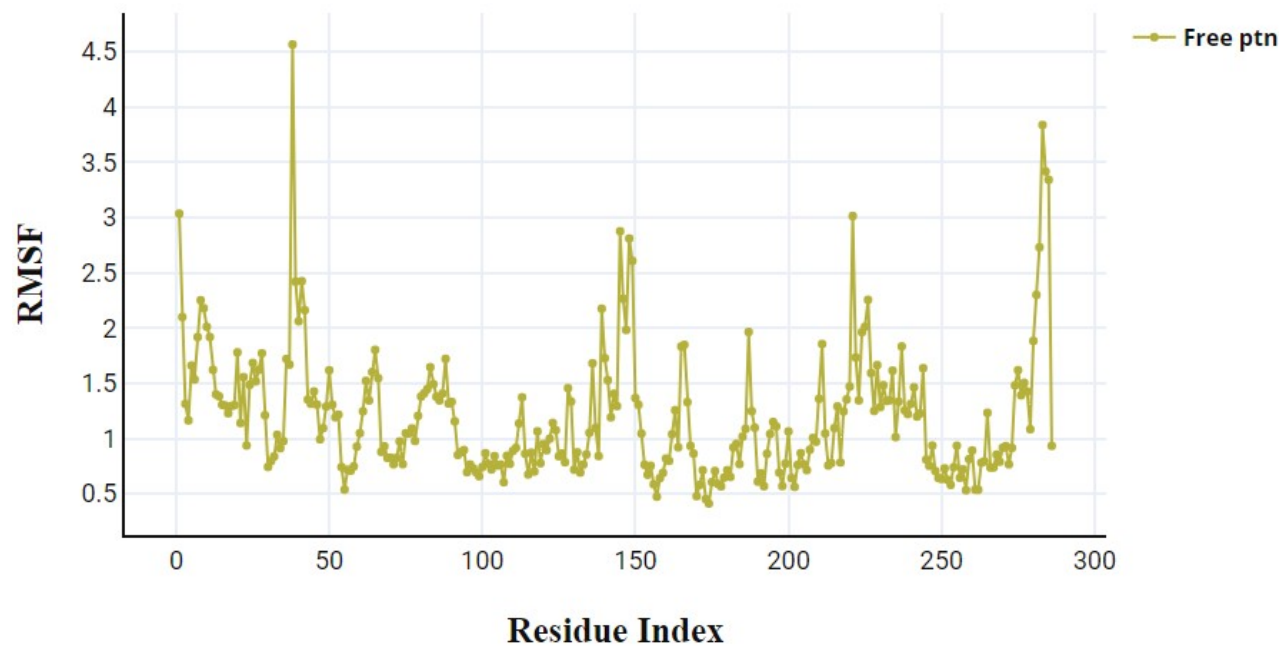

S9: RMSF compounds AT7519 (I), 4, 7a and 9

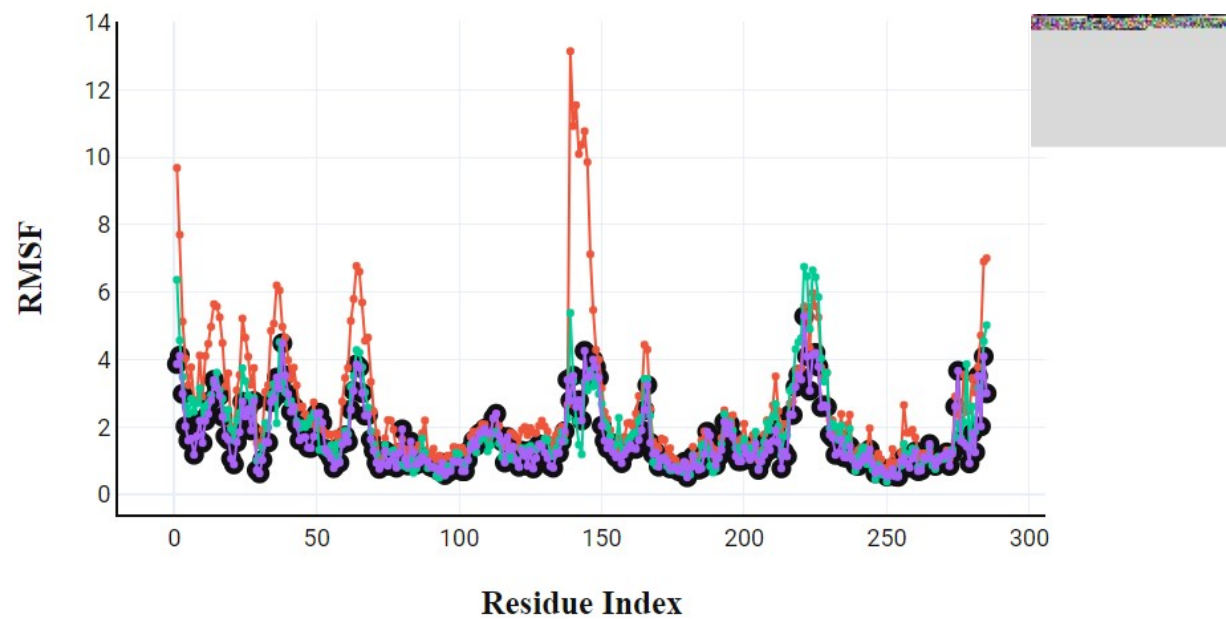



S10: <sup>1</sup>H-NMR of compound 2a

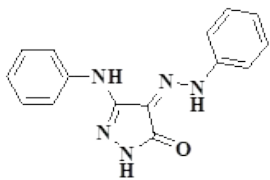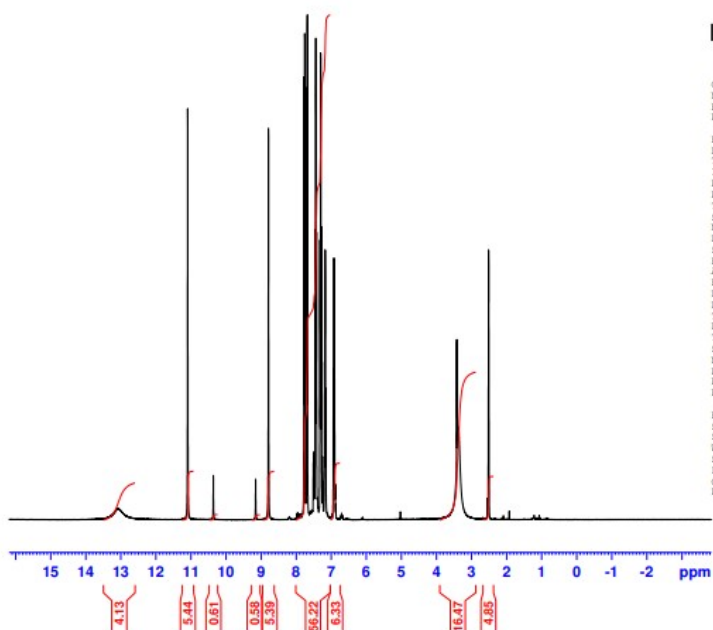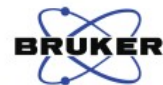

```

Current Data Parameters
NAME       7_ARM
EXPNO     10
PROCNO    1

F2 - Acquisition Parameters
Date_     20240216
Time     20.42 h
INSTRUM   spect
PROBHD    Z108618_0627 (
PULPROG   zg30
TD        65536
SOLVENT   DMSO
NS        16
DS        2
SWH       8012.820 Hz
FIDRES    0.244532 Hz
AQ        4.0894465 sec
RG        101
DW        62.400 usec
DE        16.92 usec
TE        298.2 K
D1        1.00000000 sec
TDO       1
SFO1      400.1324768 MHz
NUC1      1H
PQ        5.00 usec
P1        15.00 usec
PLM1     12.49199963 W

F2 - Processing parameters
SI        65536
SF        400.1300000 MHz
WDW       EM
SSB       0
LB        0.30 Hz
GB        0
PC        1.00
    
```

S11: <sup>13</sup>C-NMR of compound 2a

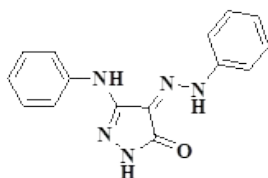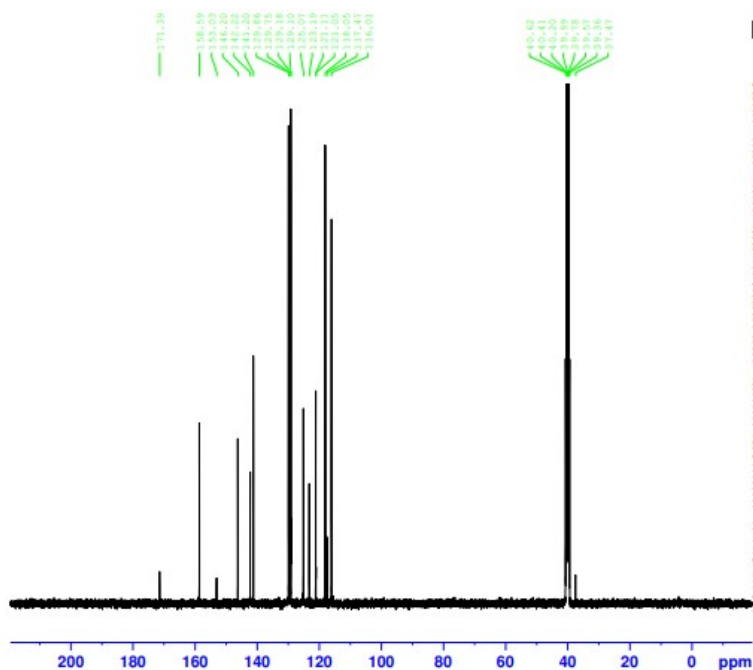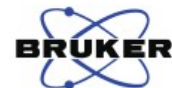

```

Current Data Parameters
NAME       7_ARM
EXPNO     11
PROCNO    1

F2 - Acquisition Parameters
Date_     20240216
Time     21.42 h
INSTRUM   spect
PROBHD    Z108618_0627 (
PULPROG   zgpg30
TD        65536
SOLVENT   DMSO
NS        1024
DS        4
SWH       24038.461 Hz
FIDRES    0.733596 Hz
AQ        1.3631488 sec
RG        203
DW        20.800 usec
DE        6.50 usec
TE        300.0 K
D1        2.00000000 sec
D11       0.03000000 sec
TDO       1
SFO1      100.6228298 MHz
NUC1      13C
PQ        3.33 usec
P1        10.00 usec
PLM1     54.08100128 W
SFO2      400.1316005 MHz
NUC2      1H
CPDPRG2   waltz165
PCPD2     90.00 usec
PLM2     12.49199963 W
PLM12    0.34698999 W
PLM13    0.17453000 W

F2 - Processing parameters
SI        32768
SF        100.6127690 MHz
WDW       EM
SSB       0
LB        1.00 Hz
GB        0
PC        1.40
    
```

S12: <sup>1</sup>H-NMR of compound **2b**

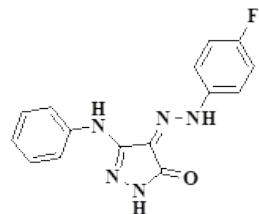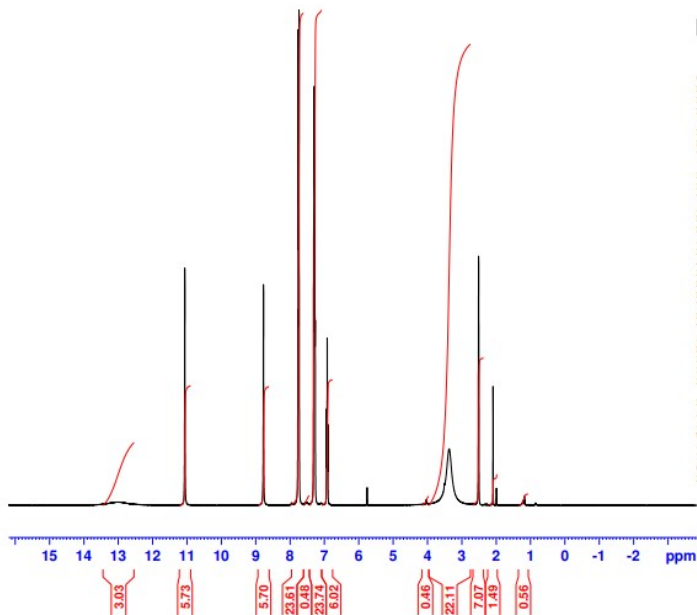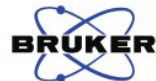

```

Current Data Parameters
NAME      5_ARM
EXPNO    10
PROCNO   1

F2 - Acquisition Parameters
Date_    20240216
Time     19.03 h
INSTRUM  spect
PROBHD   Z108618_0627 (
PULPROG  zg30
TD       65536
SOLVENT  DMSO
NS       16
DS       2
SWH      8012.820 Hz
FIDRES   0.244532 Hz
AQ       4.0894465 sec
RG       114
DM       62.400 usec
DE       16.92 usec
TE       298.9 K
D1       1.0000000 sec
TDO      1
SFO1     400.1324708 MHz
NUC1     1H
PQ       5.00 usec
P1       15.00 usec
PLW1     12.49199963 W

F2 - Processing parameters
SI       65536
SF       400.1300000 MHz
WDW      EM
SSB      0
LB       0.30 Hz
GB       0
PC       1.00
    
```

S13: <sup>13</sup>C-NMR of compound **2b**

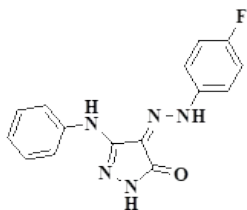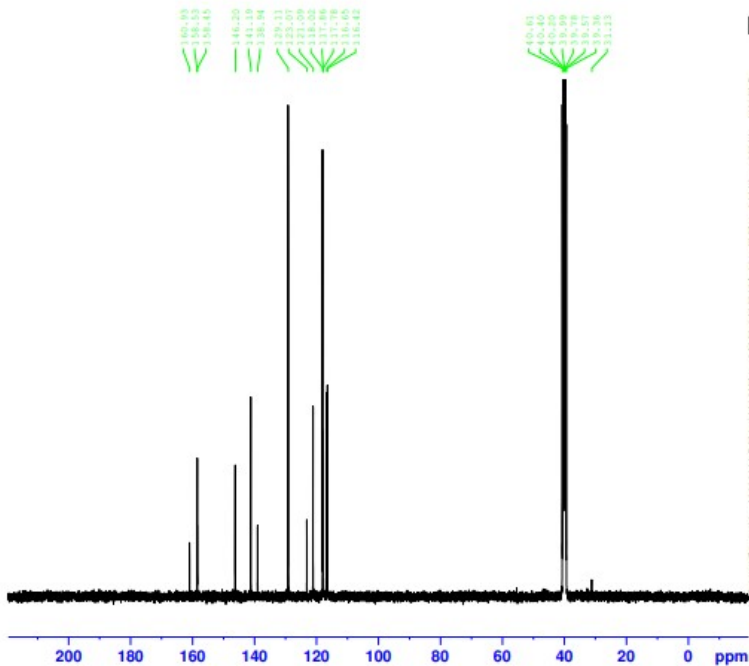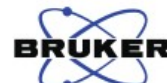

```

Current Data Parameters
NAME      5_ARM
EXPNO    11
PROCNO   1

F2 - Acquisition Parameters
Date_    20240216
Time     20.02 h
INSTRUM  spect
PROBHD   Z108618_0627 (
PULPROG  zgpg30
TD       65536
SOLVENT  DMSO
NS       1024
DS       4
SWH      24038.461 Hz
FIDRES   0.733596 Hz
AQ       1.3631488 sec
RG       203
DM       20.800 usec
DE       6.50 usec
TE       300.0 K
D1       2.0000000 sec
D11      0.0300000 sec
TDO      1
SFO1     100.6228298 MHz
NUC1     13C
PQ       3.33 usec
P1       10.00 usec
PLW1     54.08100128 W
SFO2     400.1316005 MHz
NUC2     1H
CPDPRG2  waltz65
PCPD2    90.00 usec
PLW2     12.49199963 W
PLW12    0.34698999 W
PLW13    0.17453000 W

F2 - Processing parameters
SI       32768
SF       100.6127690 MHz
WDW      EM
SSB      0
LB       1.00 Hz
GB       0
PC       1.40
    
```

S14: <sup>1</sup>H-NMR of compound 2c

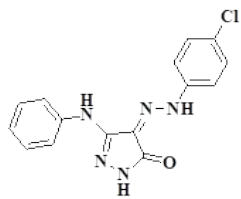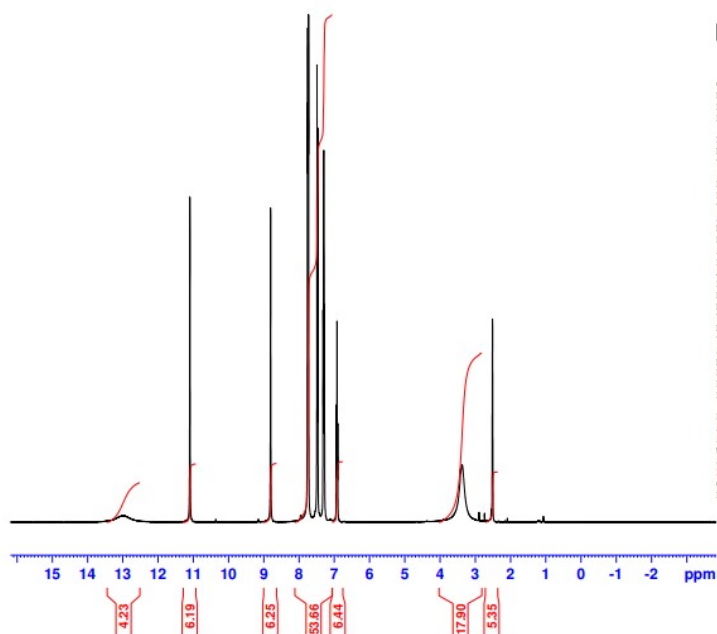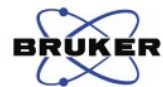

```

Current Data Parameters
NAME      1_ARM
EXPNO    10
PROCNO   1

F2 - Acquisition Parameters
Date_    20240216
Time     15.43 h
INSTRUM  spect
PROBHD   z108618_0627 (
PULPROG  zg30
TD        65536
SOLVENT  DMSO
NS        16
DS        2
SWH       8012.820 Hz
FIDRES    0.244532 Hz
AQ         4.0894465 sec
RG         101
DW         62.400 usec
DE         16.92 usec
TE         298.4 K
D1         1.00000000 sec
TDO        1
SFO1      400.1324708 MHz
NUC1       1H
FO         5.00 usec
P1         15.00 usec
PLW1      12.49199963 W

F2 - Processing parameters
SI         65536
SF         400.1300000 MHz
WDW        EM
SSB        0
LB         0.30 Hz
GB         0
PC         1.00
    
```

S15: <sup>13</sup>C-NMR of compound 2c

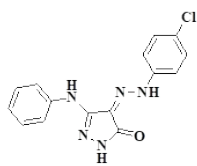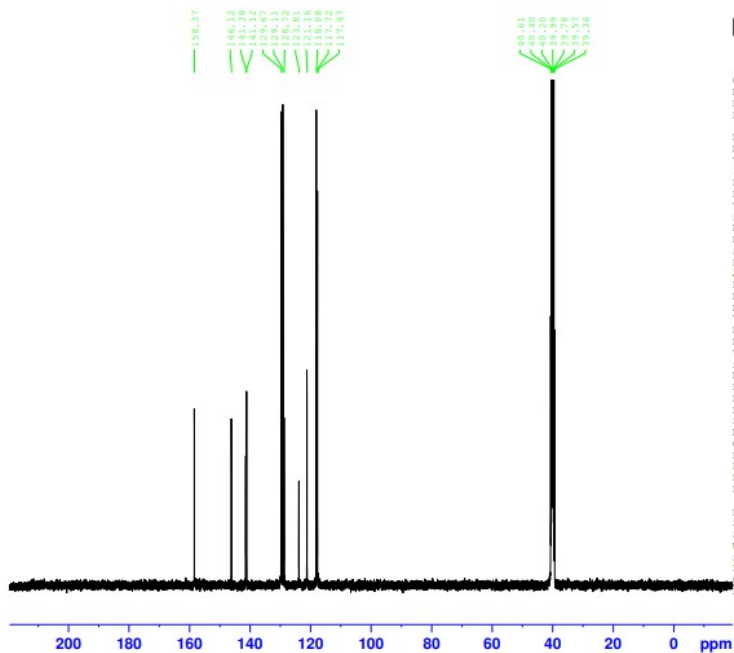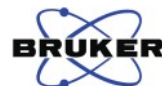

```

Current Data Parameters
NAME      1_ARM
EXPNO    11
PROCNO   1

F2 - Acquisition Parameters
Date_    20240216
Time     16.42 h
INSTRUM  spect
PROBHD   z108618_0627 (
PULPROG  zgpg30
TD        65536
SOLVENT  DMSO
NS        1024
DS        4
SWH       24038.461 Hz
FIDRES    0.733596 Hz
AQ         1.3631488 sec
RG         203
DW         20.800 usec
DE         6.50 usec
TE         300.2 K
D1         2.00000000 sec
D11        0.03000000 sec
TDO        1
SFO1      100.6228298 MHz
NUC1       13C
FO         3.33 usec
P1         10.00 usec
PLW1      54.08100128 W
SFO2      400.1316005 MHz
NUC2       1H
CPDPRG[2] waltz65
PCPD2     90.00 usec
PLW2      12.49199963 W
PLW12     0.34698999 W
PLW13     0.17453000 W

F2 - Processing parameters
SI         32768
SF         100.6127650 MHz
WDW        EM
SSB        0
LB         1.00 Hz
GB         0
PC         1.40
    
```

S16: <sup>1</sup>H-NMR of compound **2d**

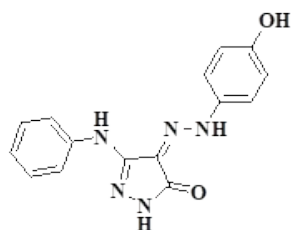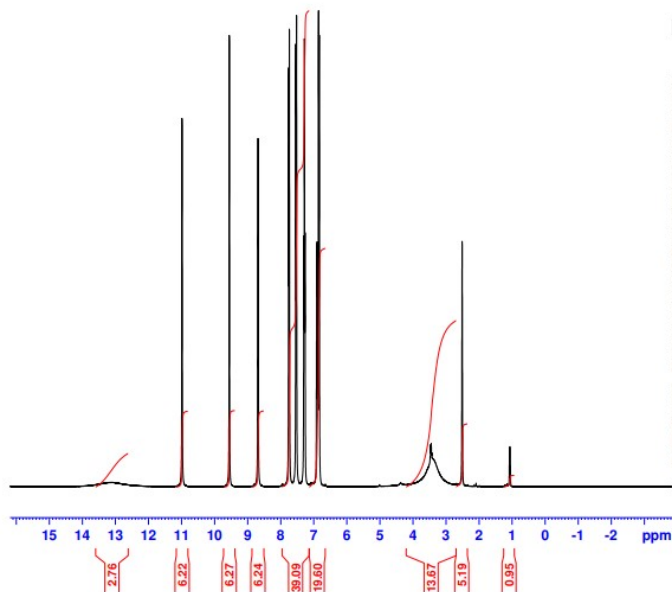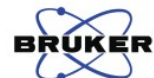

```

Current Data Parameters
NAME          2_AHM
EXPNO        10
PROCNO       1

F2 - Acquisition Parameters
Date_        20240216
Time         17.22 h
INSTRUM      spect
PROBHD       Z108618_0627 (
PULPROG      zg30
TD           65536
SOLVENT      DMSO
NS           16
DS           2
SWH          8012.820 Hz
FIDRES      0.244532 Hz
AQ          4.0894465 sec
RG           101
DW          62.400 usec
DE          16.92 usec
TE          298.9 K
D1          1.00000000 sec
TD0         1
SFO1        400.1324708 MHz
NUC1         1H
PO          5.00 usec
P1          15.00 usec
PLW1        12.49199963 W

F2 - Processing parameters
SI           65536
SF          400.1300000 MHz
WDW          EM
SSB          0
LB           0.30 Hz
GB           0
PC           1.00
    
```

S17: <sup>13</sup>C-NMR of compound **2d**

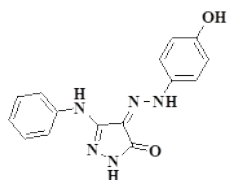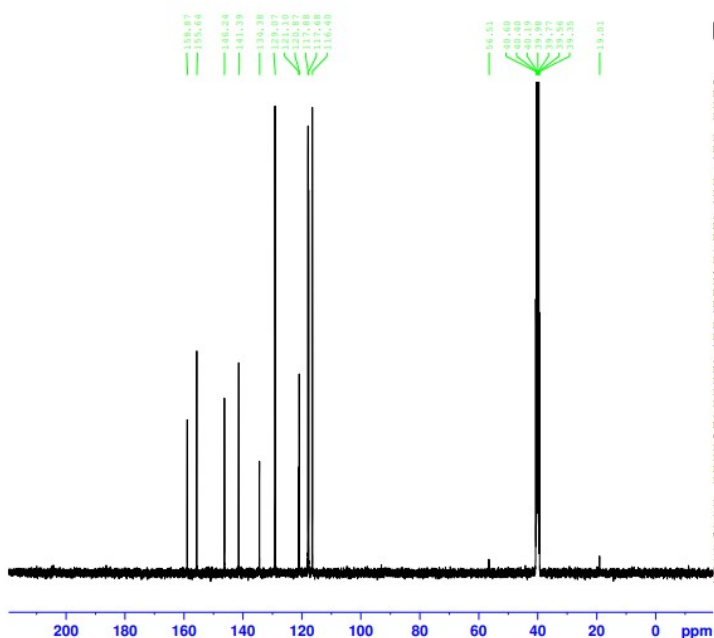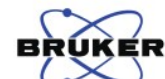

```

Current Data Parameters
NAME          2_AHM
EXPNO        11
PROCNO       1

F2 - Acquisition Parameters
Date_        20240216
Time         18.22 h
INSTRUM      spect
PROBHD       Z108618_0627 (
PULPROG      zgpg30
TD           65536
SOLVENT      DMSO
NS           1024
DS           4
SWH          24038.461 Hz
FIDRES      0.733596 Hz
AQ          1.3631488 sec
RG           203
DW          20.800 usec
DE          6.50 usec
TE          300.1 K
D1          2.00000000 sec
D11         0.03000000 sec
TD0         1
SFO1        100.6228298 MHz
NUC1         13C
PO          3.33 usec
P1          10.00 usec
PLW1        54.08100128 W
SFO2        400.1316005 MHz
NUC2         1H
CPDPRG[2]   waltz65
PCPD2       90.00 usec
PLW2        12.49199963 W
PLW12       0.34698999 W
PLW13       0.17453000 W

F2 - Processing parameters
SI           32768
SF          100.6127690 MHz
WDW          EM
SSB          0
LB           1.00 Hz
GB           0
PC           1.40
    
```







S24: <sup>1</sup>H-NMR of compound 4

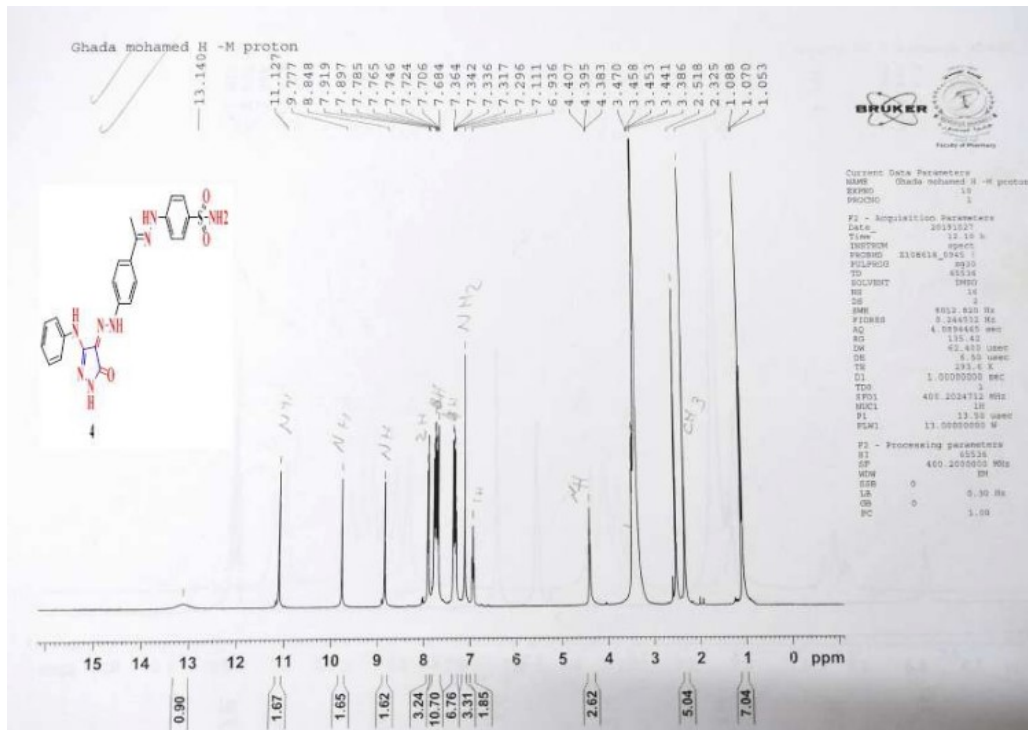

S25: <sup>13</sup>C-NMR of compound 4

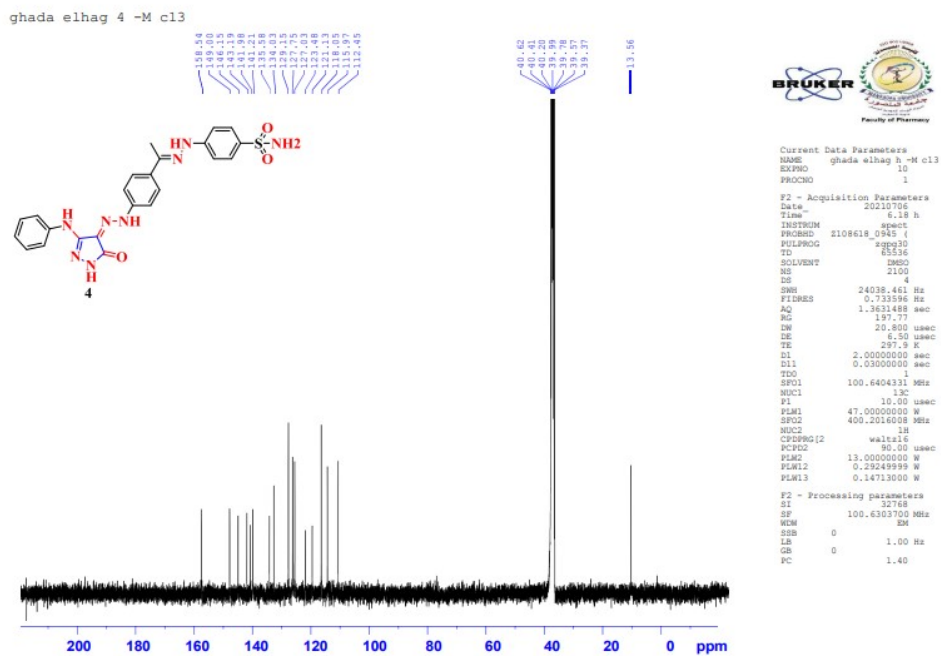



S26: <sup>1</sup>H-NMR of compound 7a

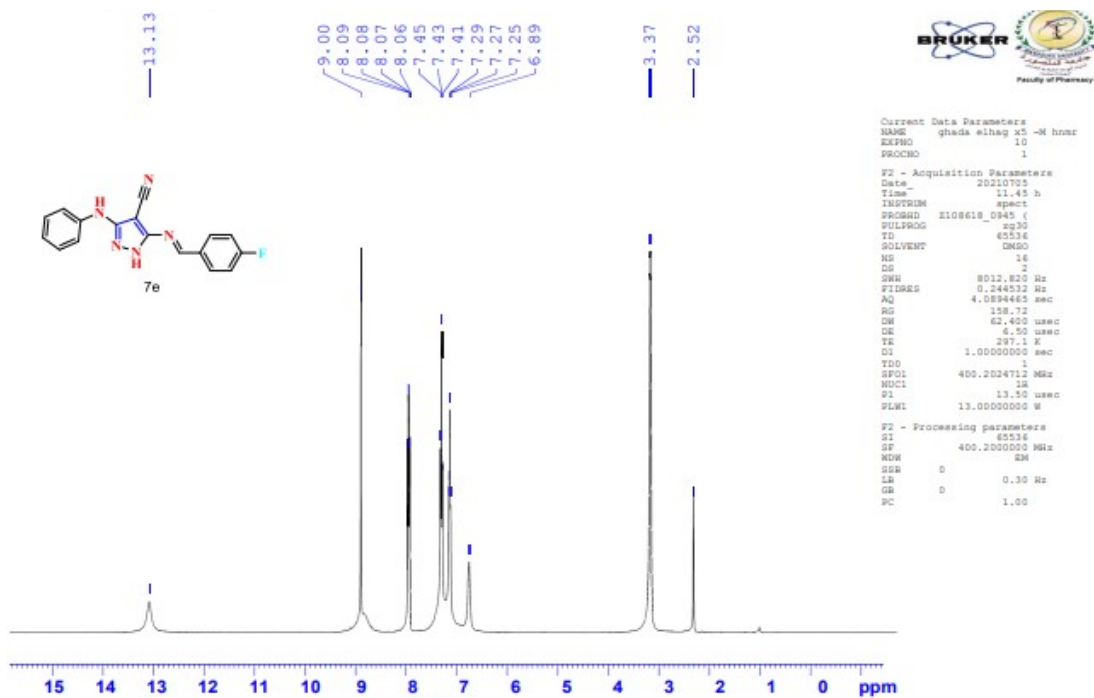

S27: <sup>13</sup>C-NMR of compound 7a

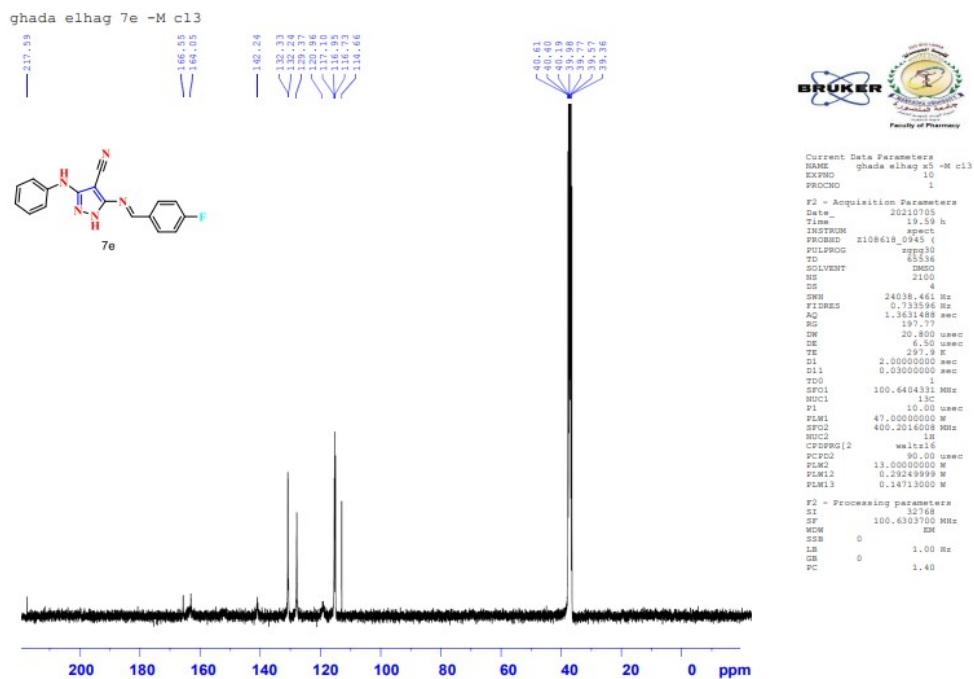

## S28: <sup>1</sup>H-NMR of compound 7b

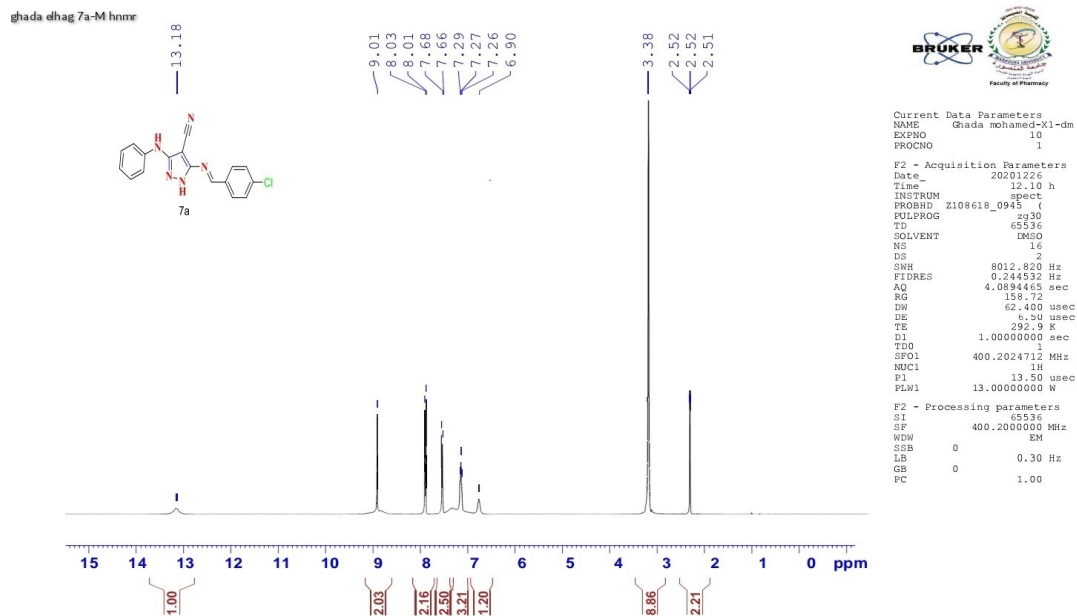

## S29: <sup>13</sup>C-NMR of compound 7b

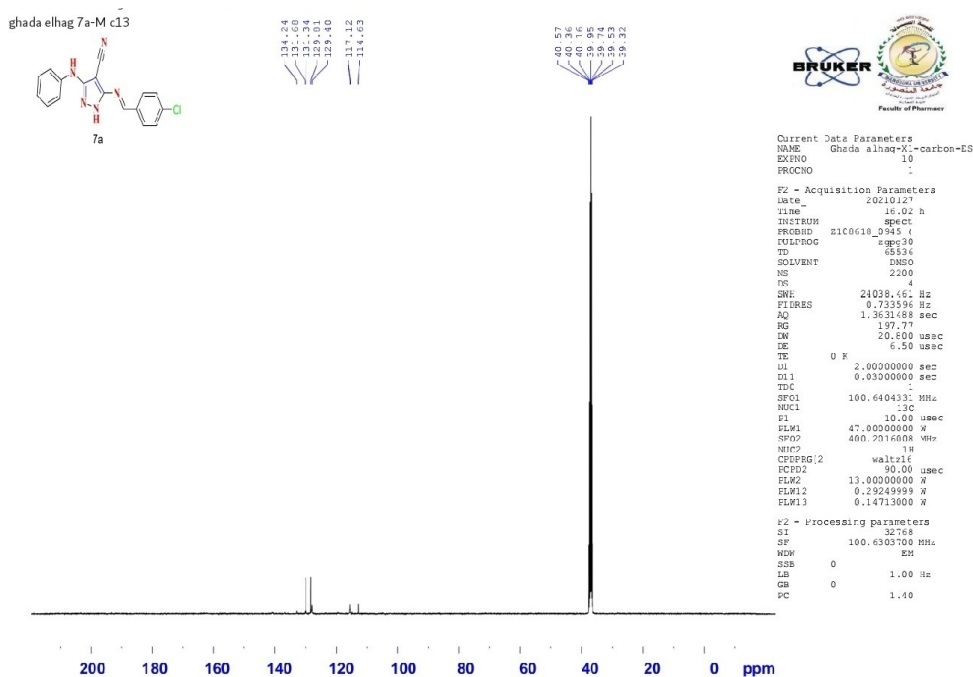

### S30: <sup>1</sup>H-NMR of compound 7c

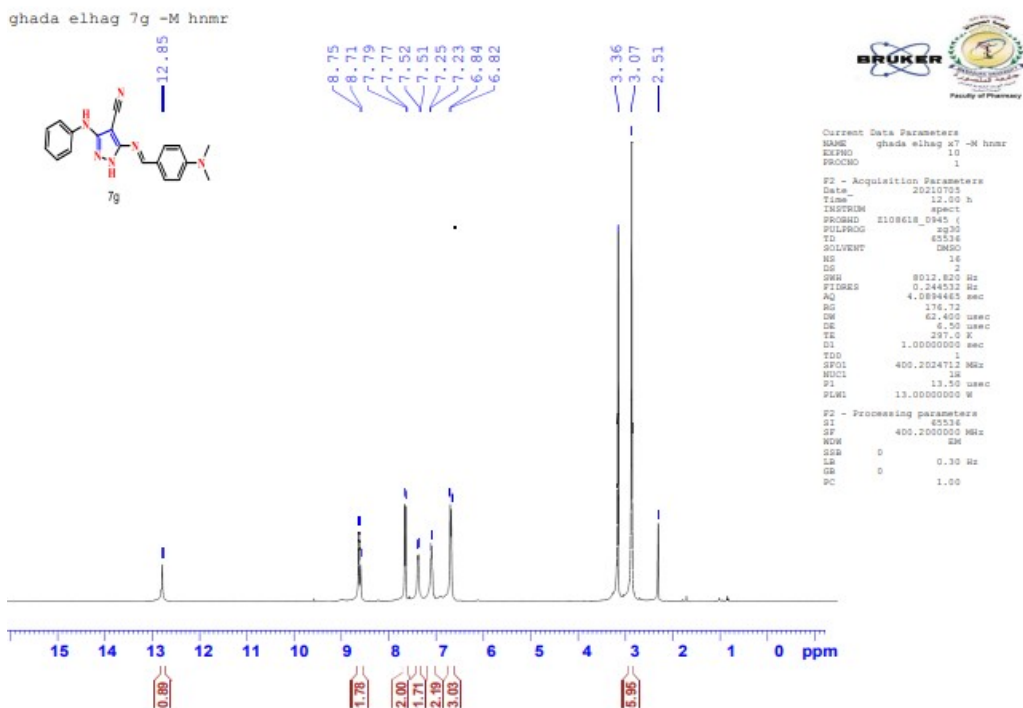

### S31: <sup>13</sup>C-NMR of compound 7c

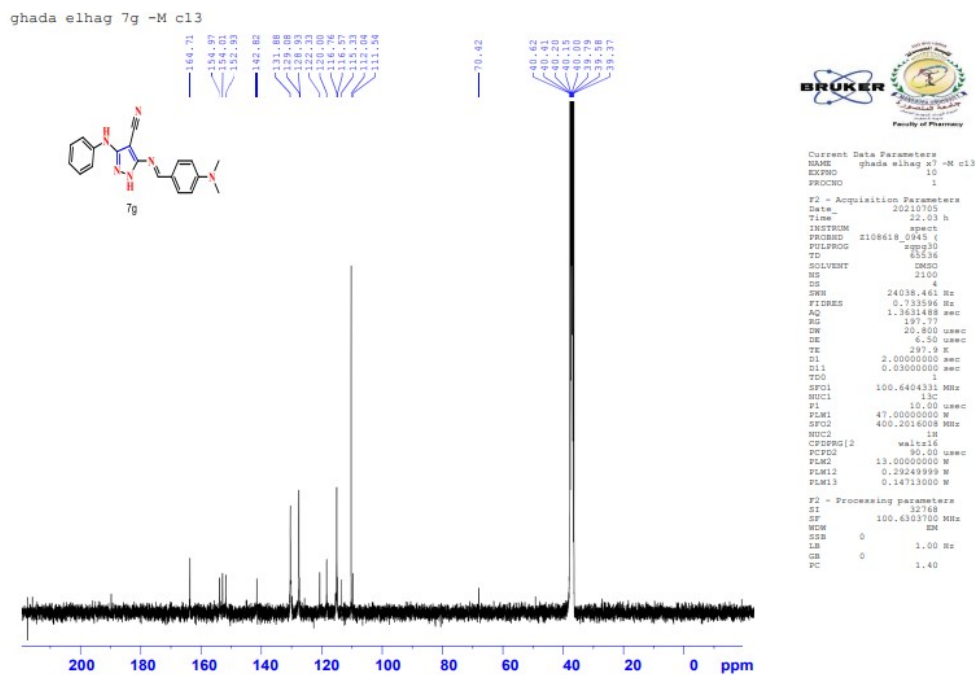

### S32: <sup>1</sup>H-NMR of compound 7d

Ghada mohamed-7b-dmso-HNMR-OE

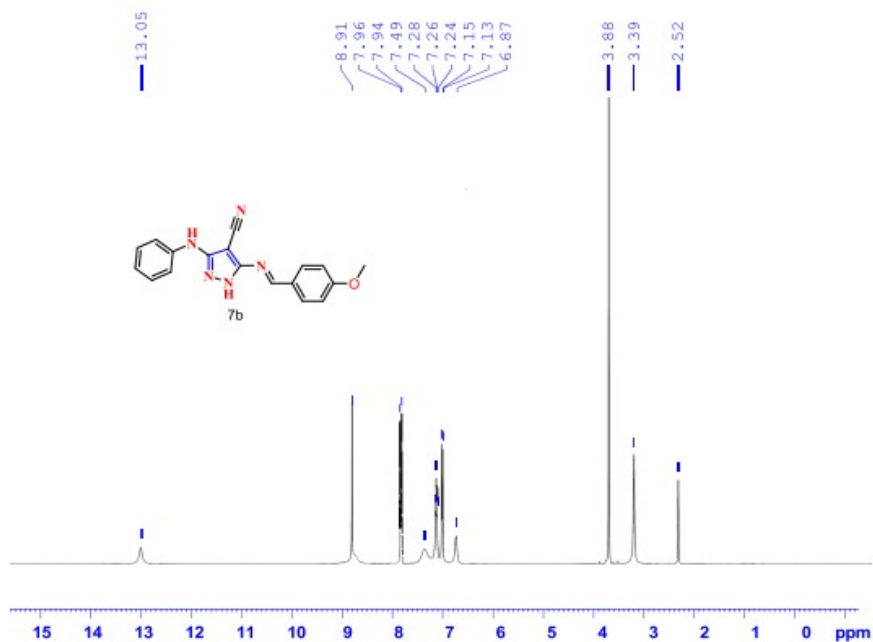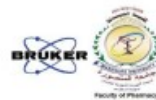

Current Data Parameters  
 NAME Ghada mohamed-X2-ds  
 EXPMO 10  
 PROCNO 1

F2 - Acquisition Parameters  
 Date\_ 20201226  
 Time\_ 12.15 h  
 INSTRUM spect  
 PROBHD z108618\_0945 ( )  
 PULPROG zg30  
 TD 65536  
 SOLVENT DMSO  
 NS 16  
 DS 2  
 SWH 8012.820 Hz  
 FIDRES 0.244532 Hz  
 AQ 4.089465 sec  
 RG 120.93  
 DW 62.400 usec  
 DE 6.50 usec  
 TE 283.0 K  
 D1 1.00000000 sec  
 TDO 1  
 SFO1 400.202471 MHz  
 NUC1 1H  
 P1 13.50 usec  
 PLW1 13.00000000 W

F2 - Processing parameters  
 SI 65536  
 SF 400.2000000 MHz  
 WMW EM  
 SSB 0  
 LB 0.30 Hz  
 GB 0  
 PC 1.00

### S33: <sup>13</sup>C-NMR of compound 7d

Ghada alhag-7b

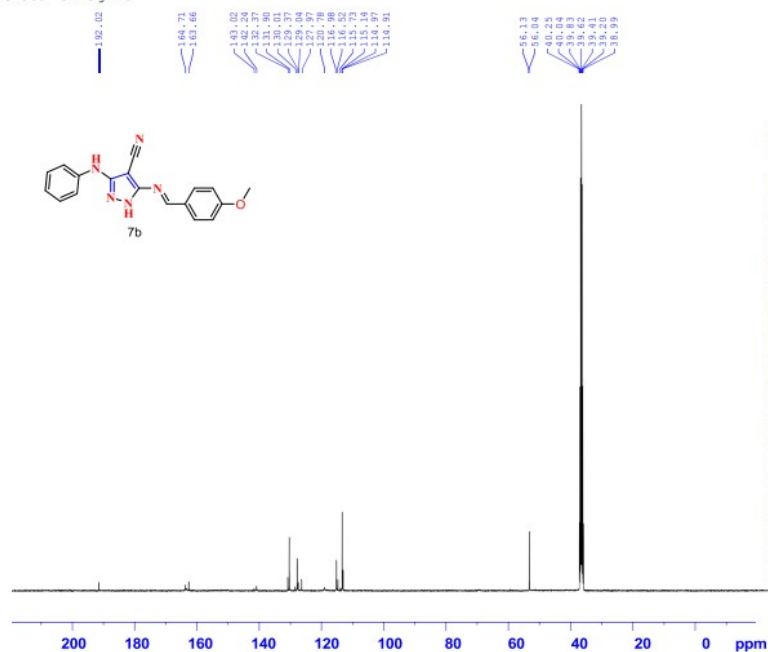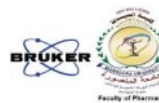

Current Data Parameters  
 NAME Ghada alhag-X2-carbon-ES  
 EXPMO 10  
 PROCNO 1

F2 - Acquisition Parameters  
 Date\_ 20210127  
 Time\_ 18.11 h  
 INSTRUM spect  
 PROBHD z108618\_0945 ( )  
 PULPROG zgpg30  
 TD 65536  
 SOLVENT DMSO  
 NS 2200  
 DS 4  
 SWH 24038.461 Hz  
 FIDRES 0.733596 Hz  
 AQ 1.3631488 sec  
 RG 197.77  
 DW 20.800 usec  
 DE 6.50 usec  
 TE 0 K  
 D1 2.00000000 sec  
 D11 0.03000000 sec  
 TDO 1  
 SFO1 100.6404331 MHz  
 NUC1 13C  
 P1 10.00 usec  
 PLW1 47.00000000 W  
 SFO2 400.2016008 MHz  
 NSCC 16  
 CPOPG12 waitz16  
 PCPD2 90.00 usec  
 PLM2 13.00000000 W  
 PLM12 0.29249999 W  
 PLM13 0.14713000 W

F2 - Processing parameters  
 SI 32768  
 SF 100.6303700 MHz  
 WMW EM  
 SSB 0  
 LB 1.00 Hz  
 GB 0  
 PC 1.40

### S34: <sup>1</sup>H-NMR of compound 8a

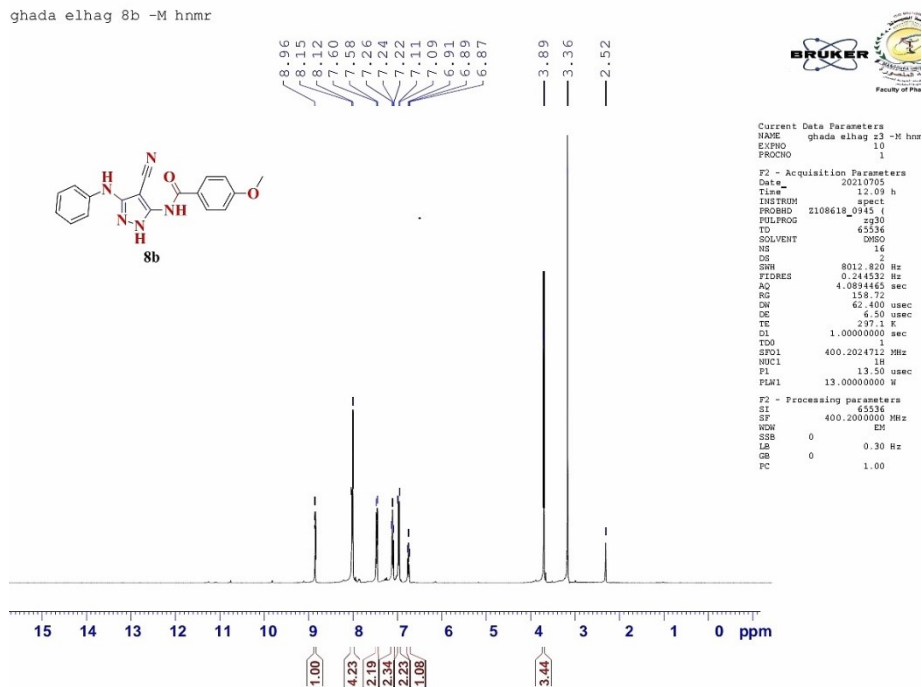

### S35: <sup>13</sup>C-NMR of compound 8a

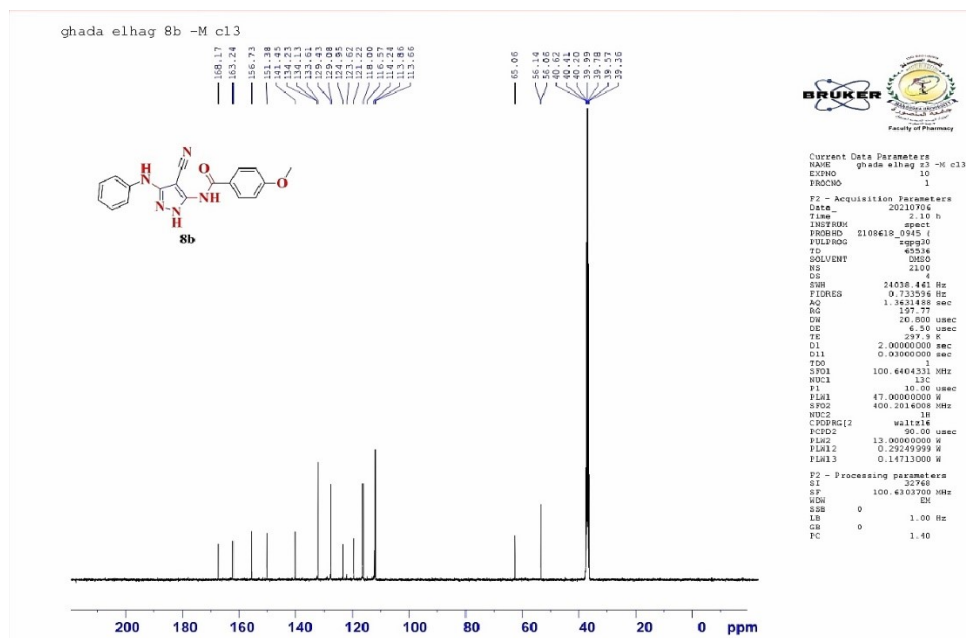

### S36: <sup>1</sup>H-NMR of compound 8b

ghada elhag 8c -M hnmr

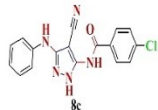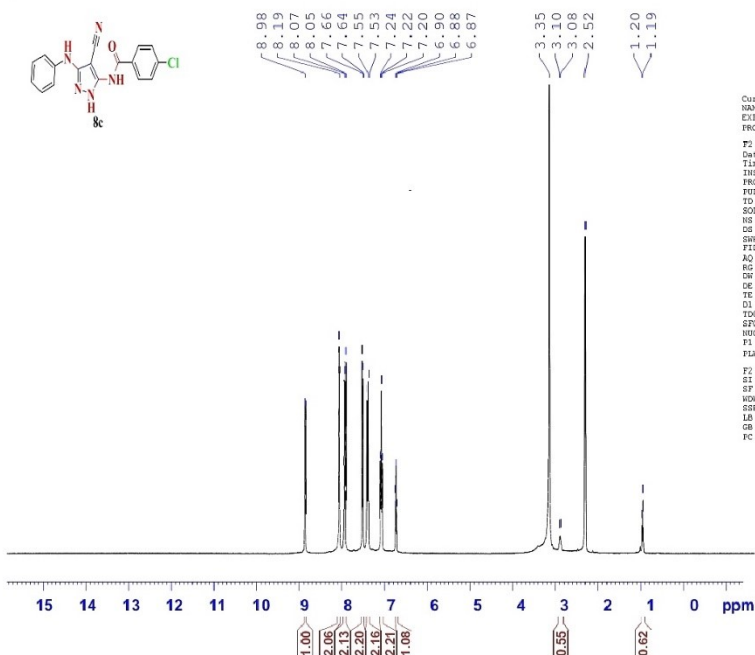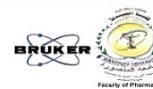

```
Current Data Parameters
NAME      ghada elhag 8c -M hnmr
EXPNO    10
PROCNO   1

F2 - Acquisition Parameters
Date_    20210705
Time     11.40 h
INSTRUM  spect
PROBHD   1108618_0945 1
PULPROG  zg30
TD       65536
SOLVENT  DMSO
NS       16
DS       2
SFO1     400.2024712 MHz
SF       400.2024712 MHz
NUC1     1H
PC       13.50 usec
PL1      13.00000000 W

F2 - Processing parameters
SI       65536
SF       400.2000000 MHz
WDW      EM
SSB      0
LB       0.30 Hz
GB       0
PC       1.00
```

### S37: <sup>1</sup>H-NMR of compound 9

Ghada elhag-9-DMSO-Hnmr-A

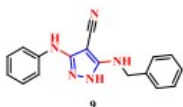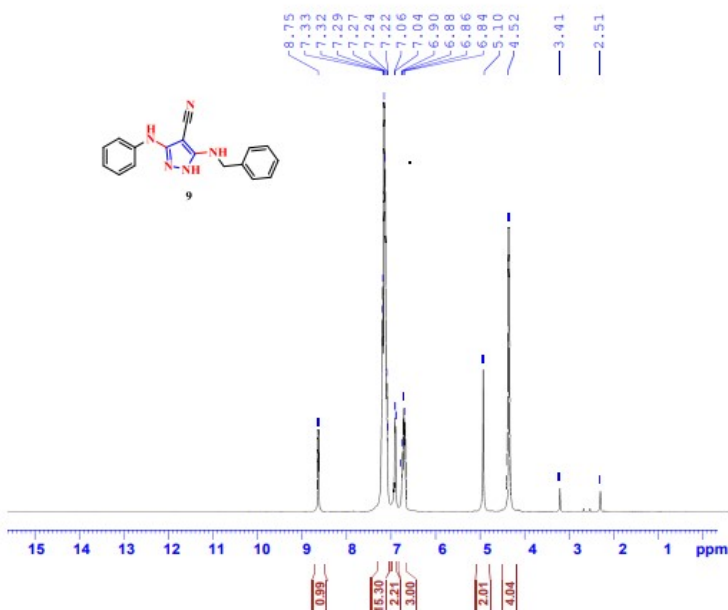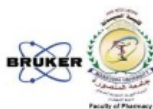

```
Current Data Parameters
NAME      Ghada elhag-9-DMSO-Hn
EXPNO    10
PROCNO   1

F2 - Acquisition Parameters
Date_    20210401
Time     11.51 h
INSTRUM  spect
PROBHD   1108618_0945 1
PULPROG  zg30
TD       65536
SOLVENT  DMSO
NS       16
DS       2
SFO1     400.2024712 MHz
SF       400.2024712 MHz
NUC1     1H
PC       13.50 usec
PL1      13.00000000 W

F2 - Processing parameters
SI       65536
SF       400.2000000 MHz
WDW      EM
SSB      0
LB       0.30 Hz
GB       0
PC       1.00
```









S44: IR of compound **2f**

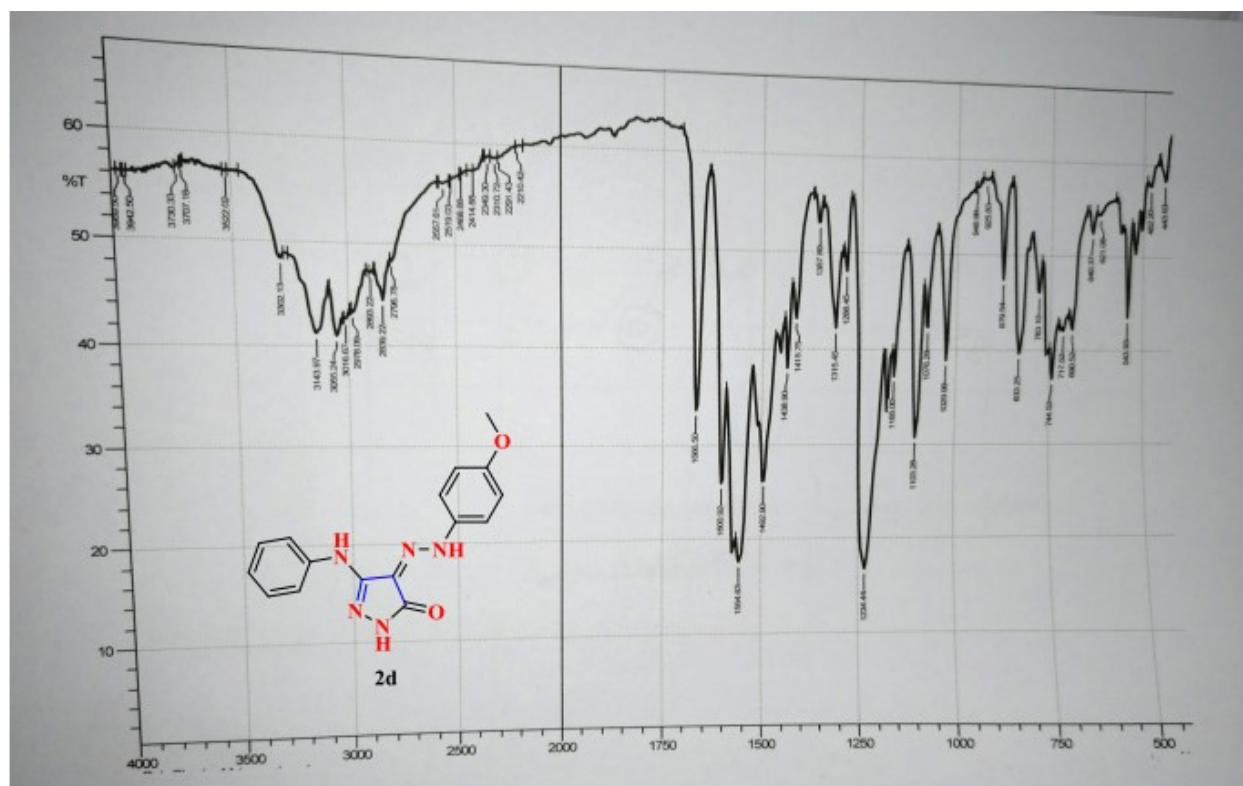

S45: IR of compound **2g**

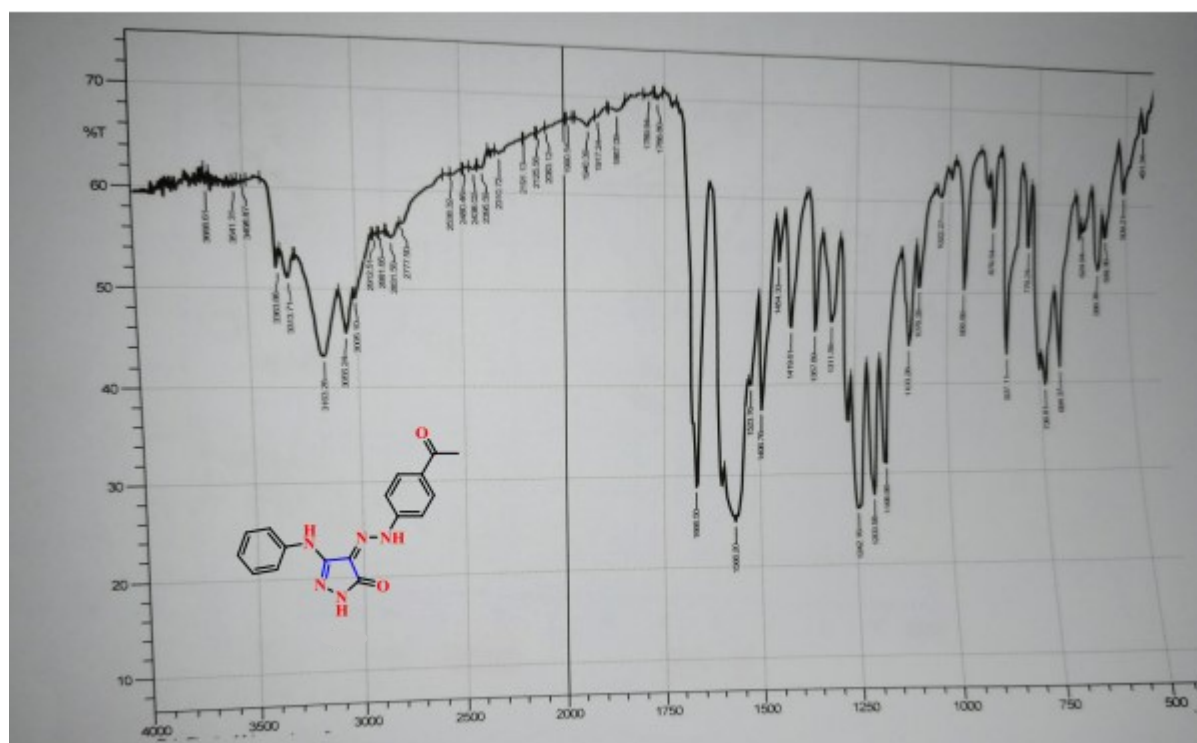

S46: Inhibition of CDK2/CyclinA2 by compounds **2a-g**, **4**, **7a-d**, **8a-b**, **9** & **10** at 50  $\mu$ M.

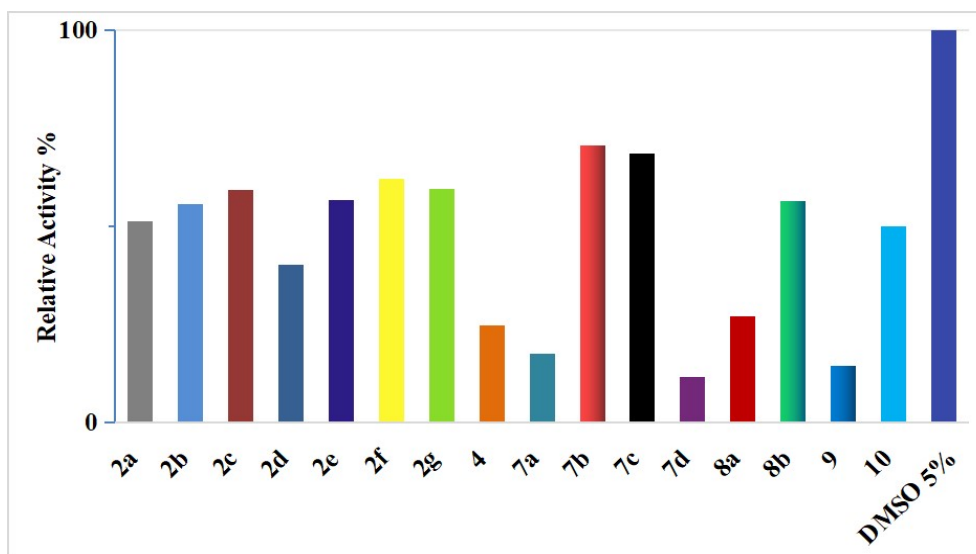

S47: The dose–response curves show the Inhibitory Concentration at 50% ( $IC_{50}$ ) curves of compounds **4**, **7c**, **7d**, **8b** and **9** in CDK2/Cyclin A2 protein kinase activity assay.

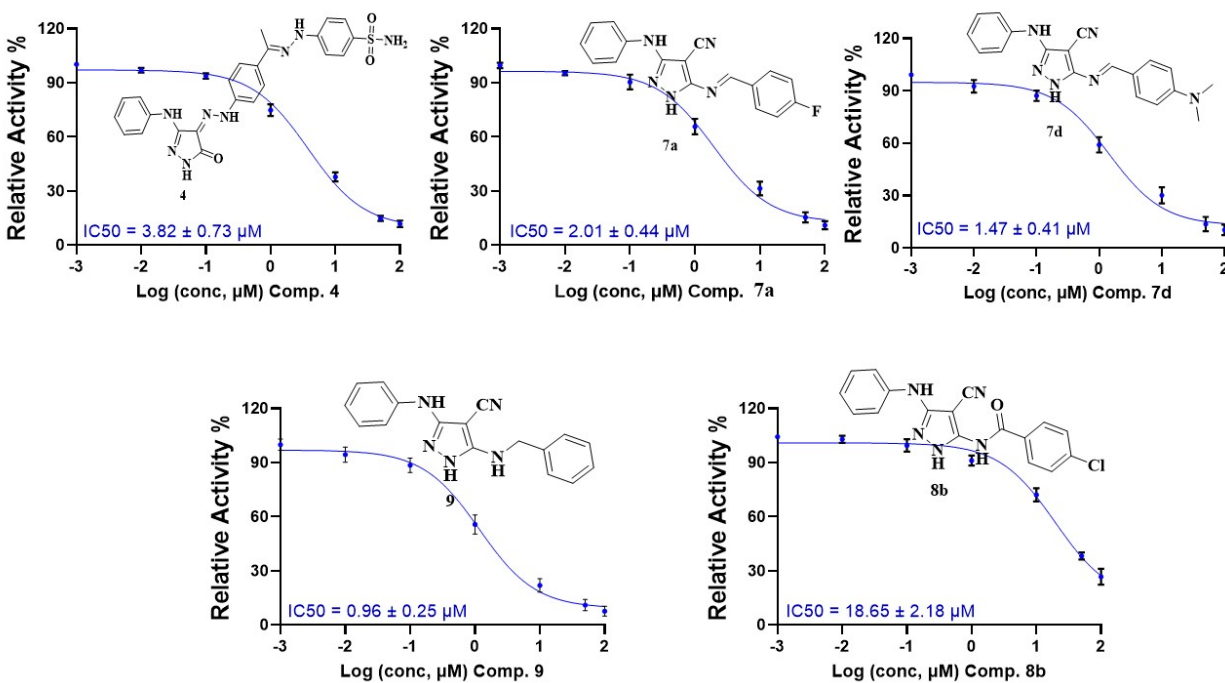

S48: Flow cytometric analysis for cell cycle distribution. (A) Control HCT-116, (B) Compound 4, and (C) graphical representation for cell cycle distribution analysis among differently treated cells.

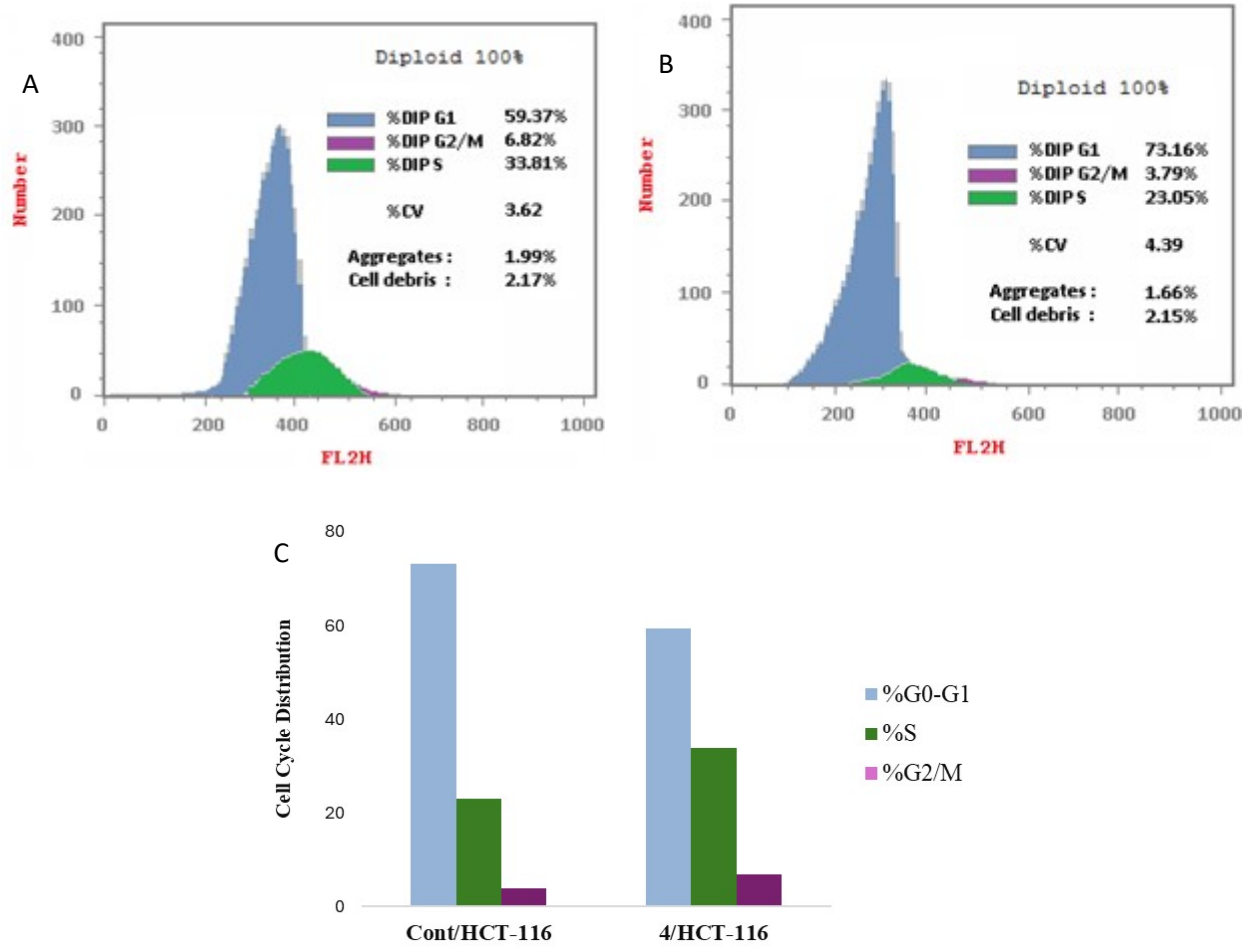

S49: Flow cytometric analysis of apoptosis among treated cells. (A) Control HCT-116, (B) Compound 4, (C) Graphical illustration of apoptosis % among differently treated cells.

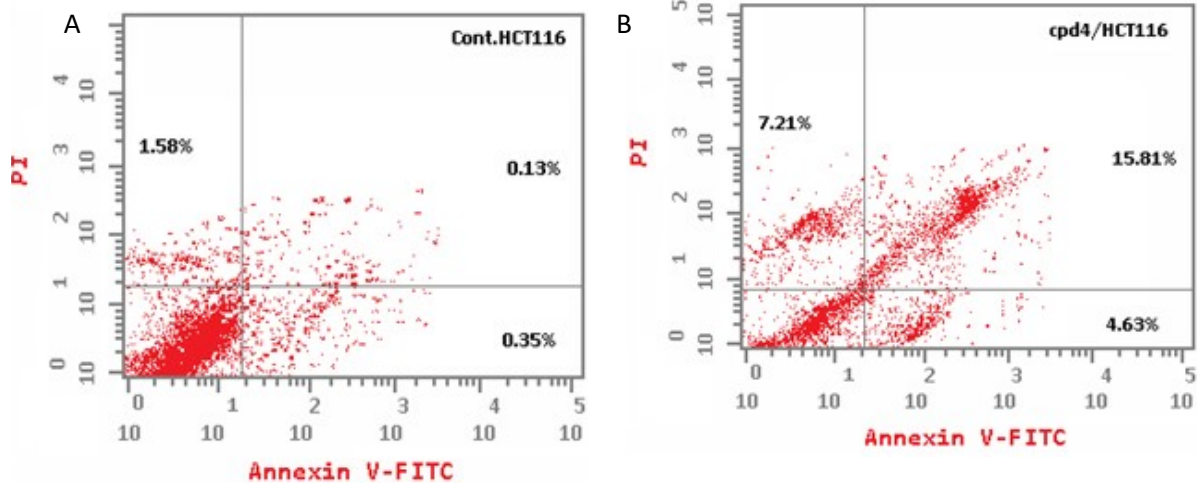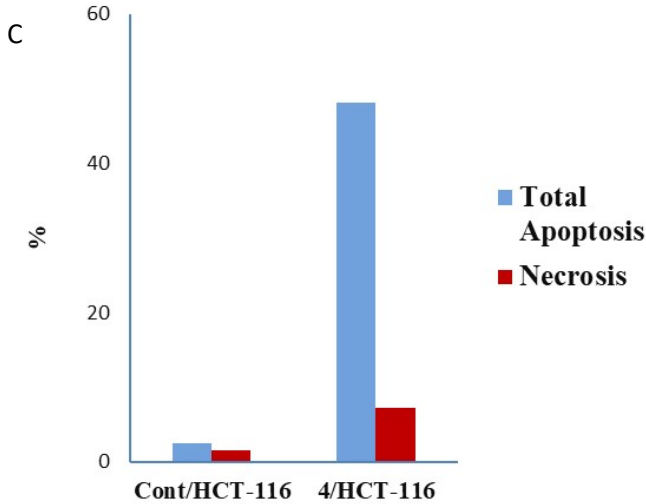

S50: Cell cycle and apoptosis raw data

| Ser | Sample        |              |       | Cytotoxicity  | SD<br>± |
|-----|---------------|--------------|-------|---------------|---------|
|     | code          | M.W<br>g/mol | cells | IC50          |         |
|     |               |              |       | uM            |         |
| 1   | cpd4          | 490.54       | ---   | <b>1.806</b>  | 0.07    |
| 2   | cpd9          | 289.33       | ---   | <b>10.003</b> | 0.39    |
| 3   | Staurosporine | 466.54       | ---   | <b>7.022</b>  | 0.27    |

| ser | Sample      |            | DNA content |       |       |                        |
|-----|-------------|------------|-------------|-------|-------|------------------------|
|     | code        | IC50<br>uM | %G0-G1      | %S    | %G2/M | Comment                |
| 1   | cpd4/HCT116 | ---        | 73.16       | 23.05 | 3.79  | cell growth arrest@ G1 |
| 2   | Cont.HCT116 | ---        | 59.37       | 33.81 | 6.82  | ---                    |

| s | code        | conc | Apoptosis    |             |              | Necrosis    |
|---|-------------|------|--------------|-------------|--------------|-------------|
|   |             |      | Total        | Early       | Late         |             |
| 1 | cpd4/HCT116 | ---  | <b>27.65</b> | <b>4.63</b> | <b>15.81</b> | <b>7.21</b> |
| 2 | Cont.HCT116 | ---  | <b>2.06</b>  | <b>0.35</b> | <b>0.13</b>  | <b>1.58</b> |

S51: Western Blot assay for compounds 4, 9

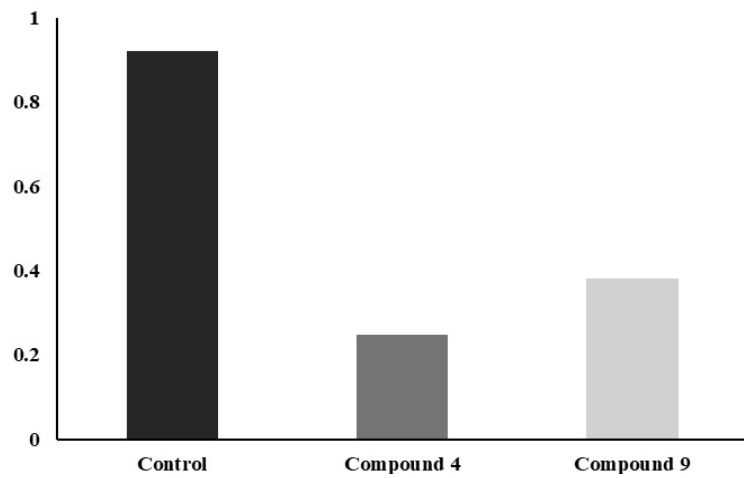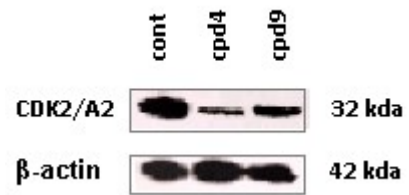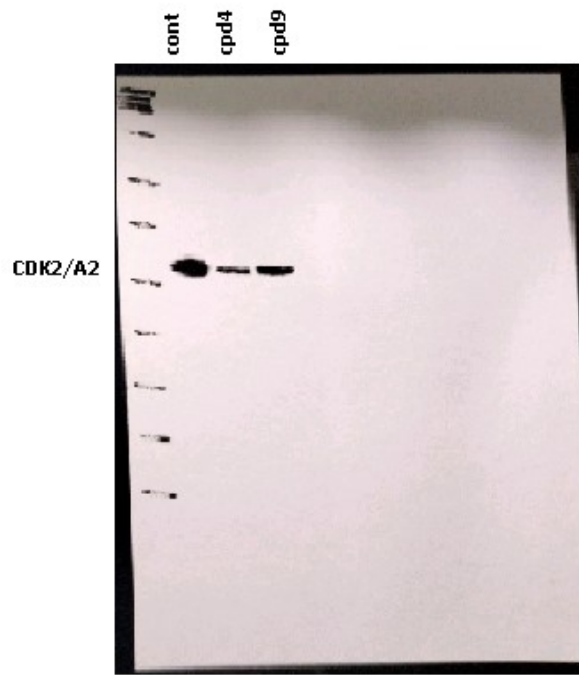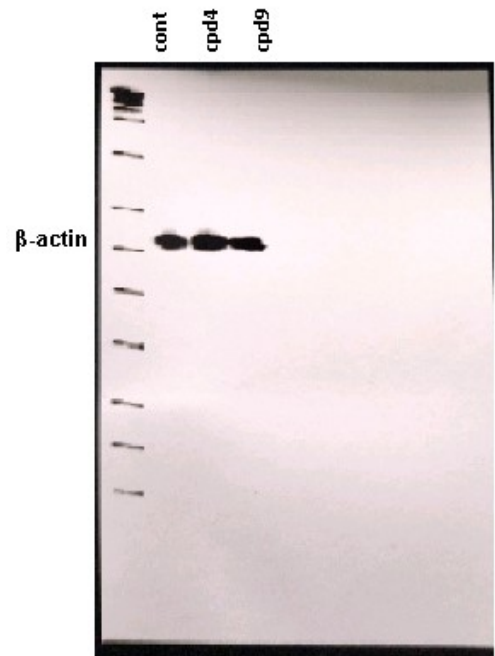

S52: Mass Results compound 4

The Regional Center For mycology And Biotechnology  
RCMB

RT: 1.56 - 1.67 SM: 11B

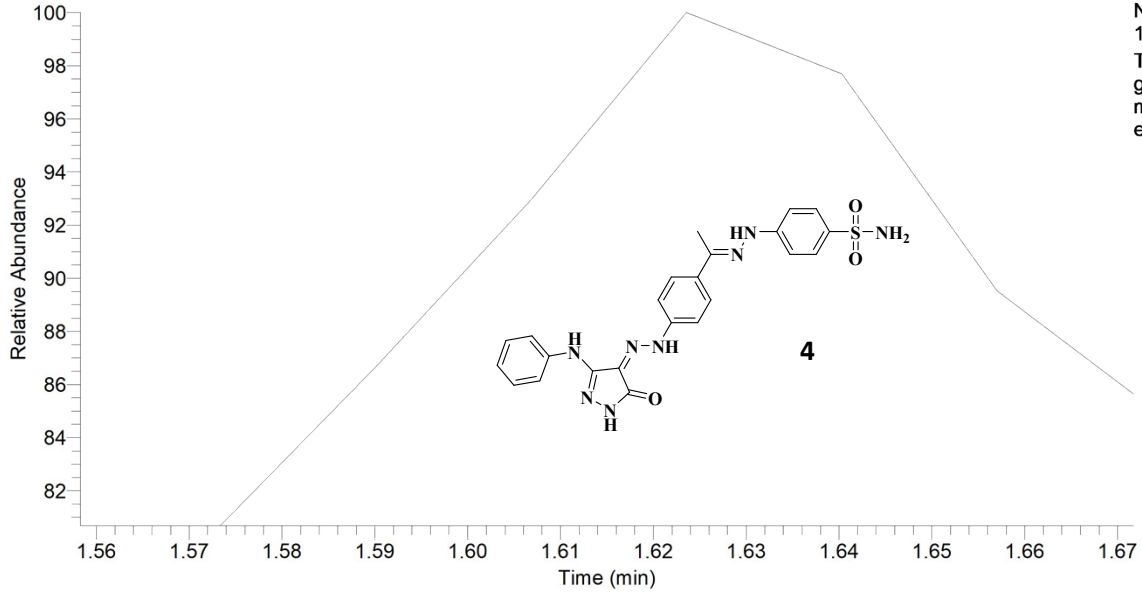

ghada-mohamed-elhag-h #69-70 RT: 1.17-1.19 AV: 2 SB: 26 1.21-1.34, 0.87-1.14 NL: 1.90E2  
T: + c EI Full ms [40.00-1000.00]

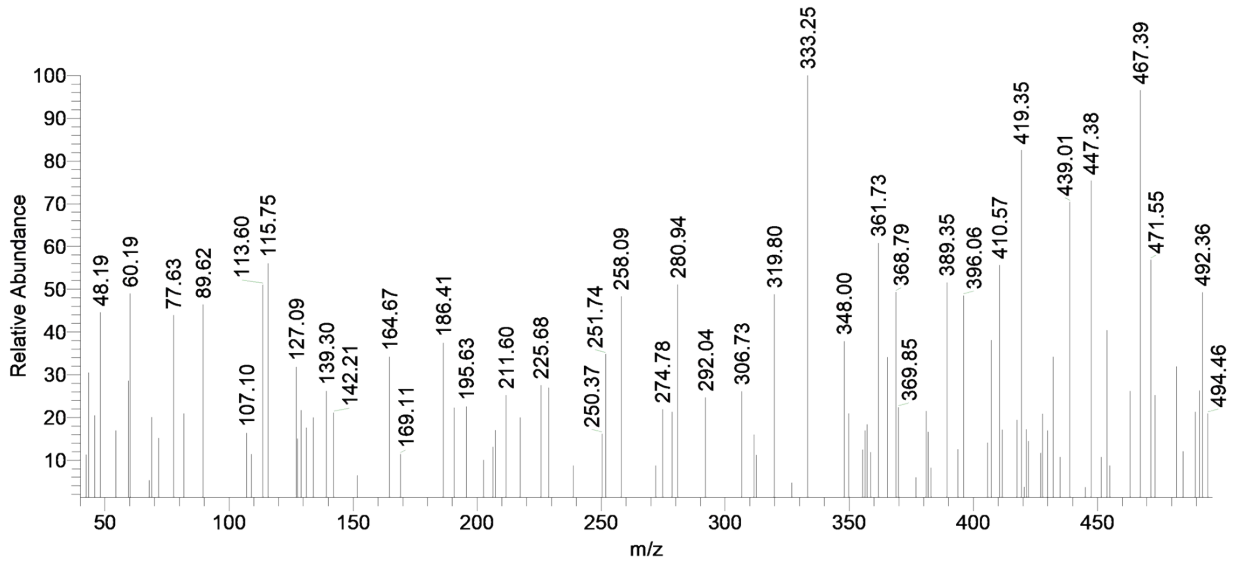



S53: Mass Results compound **7d**

The Regional Center For mycology And Biotechnology  
RCMB

RT: 5.04 - 5.29 SM: 11B

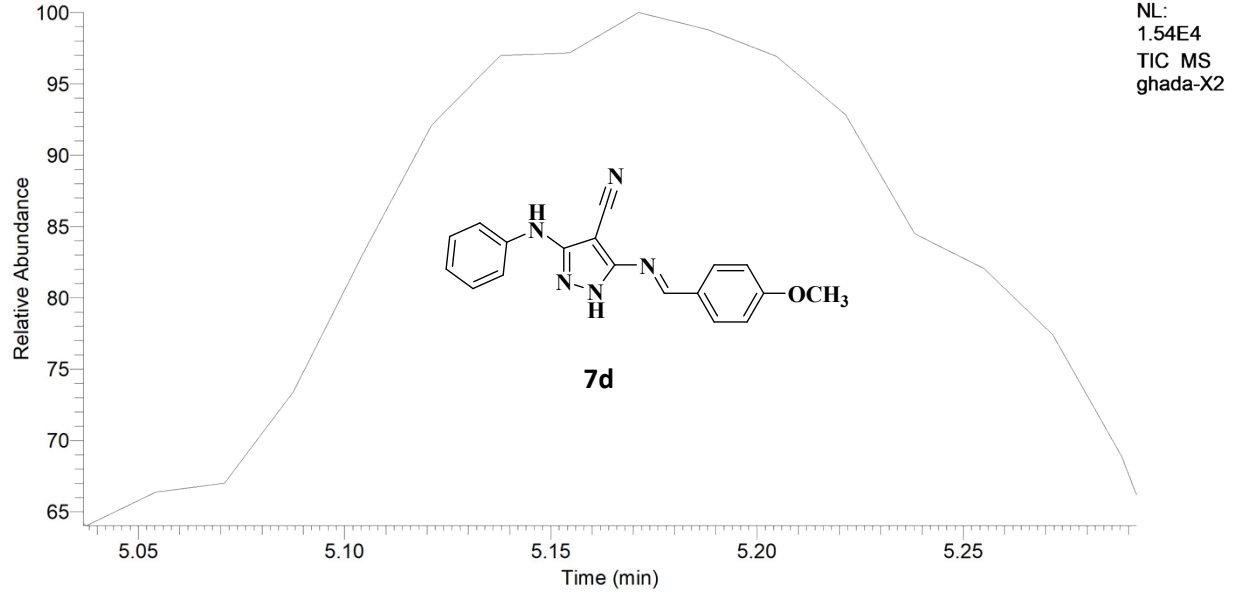

ghada-X2 #85-92 RT: 1.44-1.56 AV: 8 SB: 26 1.21-1.34, 0.87-1.14 NL: 5.14E1  
T: + c EI Full ms [40.00-1000.00]

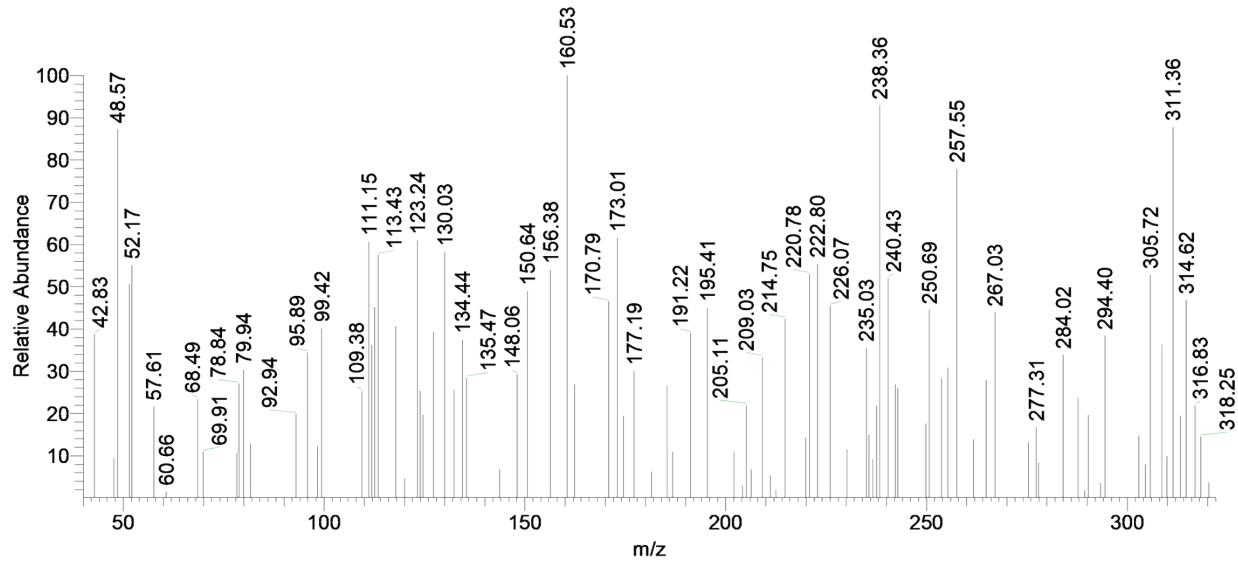

S54: Mass results compound **8a**

The Regional Center For mycology And Biotechnology  
RCMB

RT: 2.64 - 2.78 SM: 11B

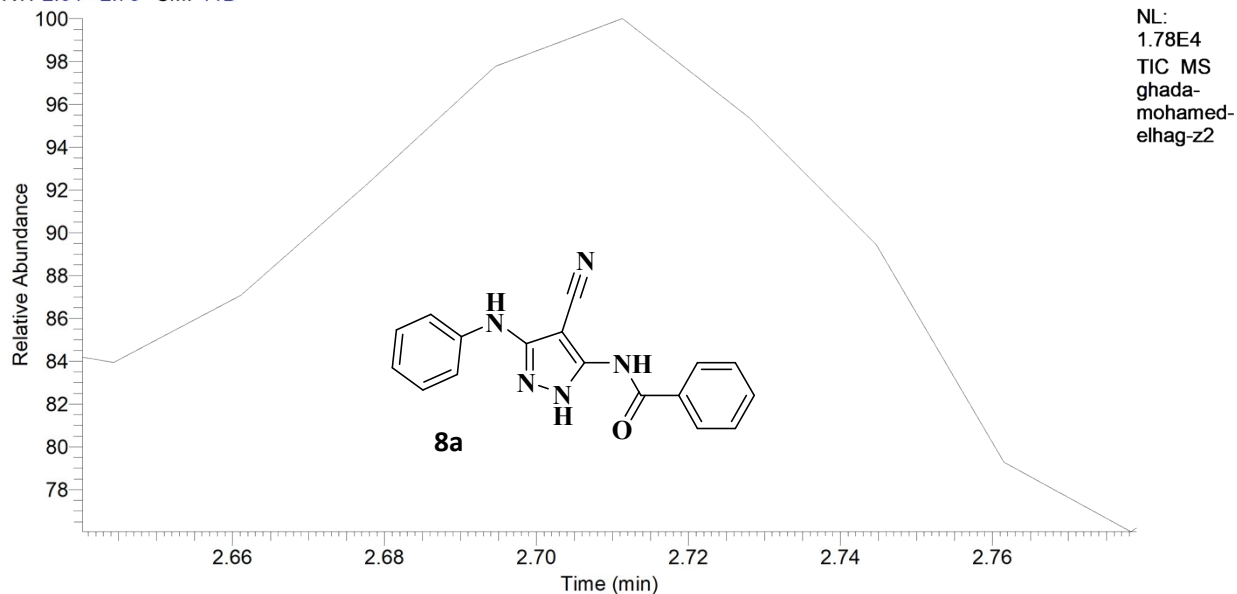

ghada-mohamed-elhag-z2 #216-220 RT: 3.63-3.70 AV: 5 SB: 26 1.21-1.34 , 0.87-1.14 NL: 1.45E2  
T: + c EI Full ms [40.00-1000.00]

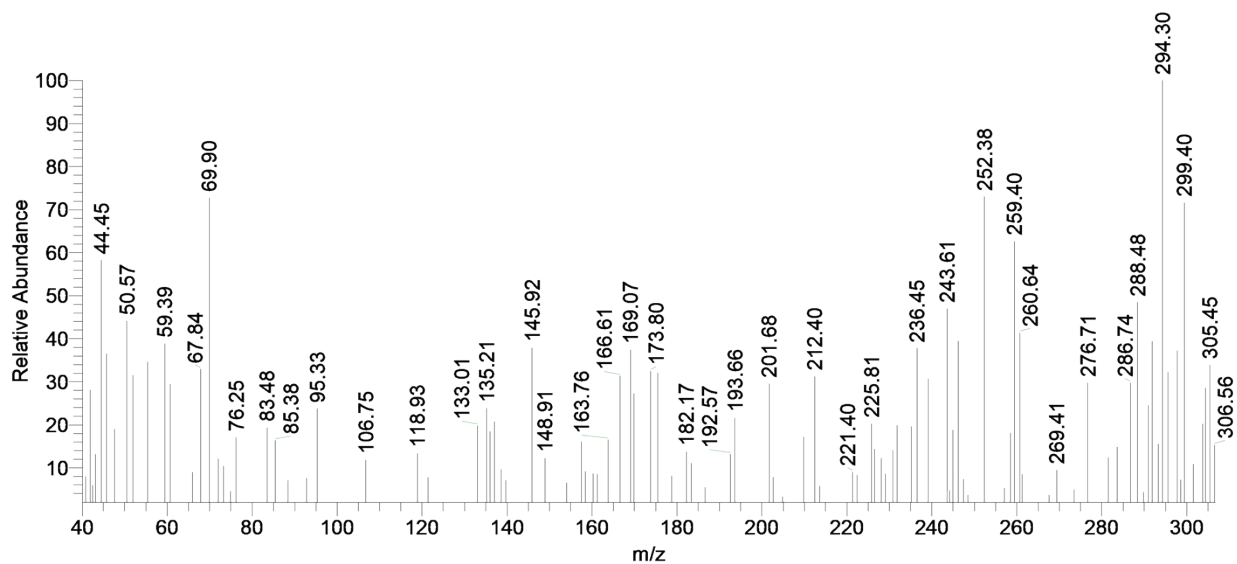

S55: Mass Results compound 9

The Regional Center For mycology And Biotechnology  
RCMB

RT: 3.71 - 4.30 SM: 11B

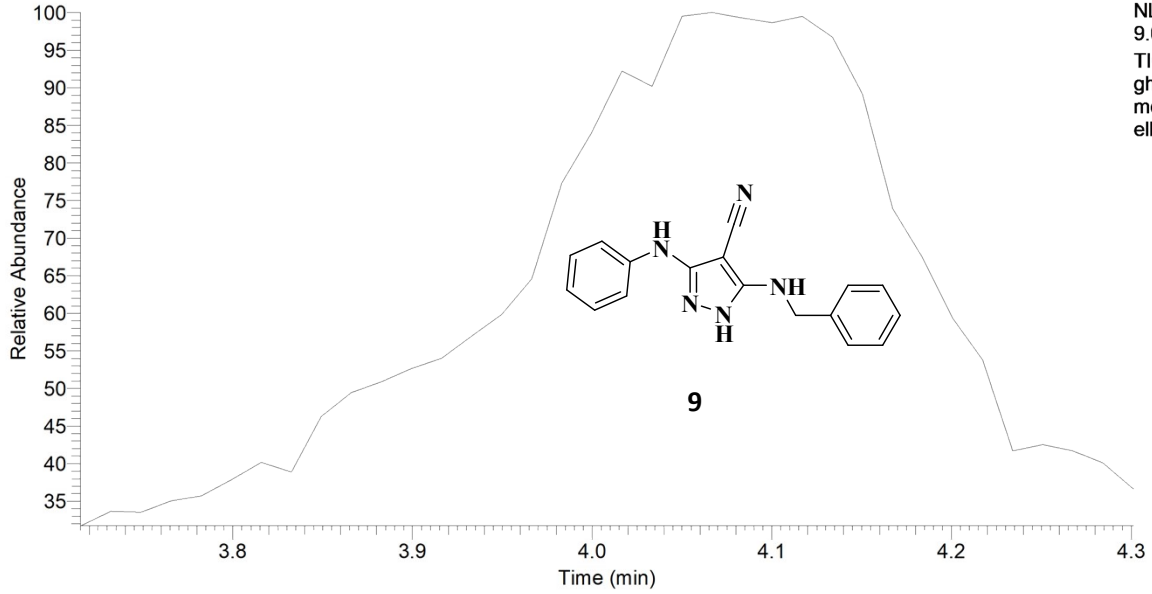

ghada-mohamed-elhag0-z1 #323-324 RT: 5.42-5.44 AV: 2 SB: 26 1.21-1.34 , 0.87-1.14 NL: 1.60E2  
T: + c EI Full ms [40.00-1000.00]

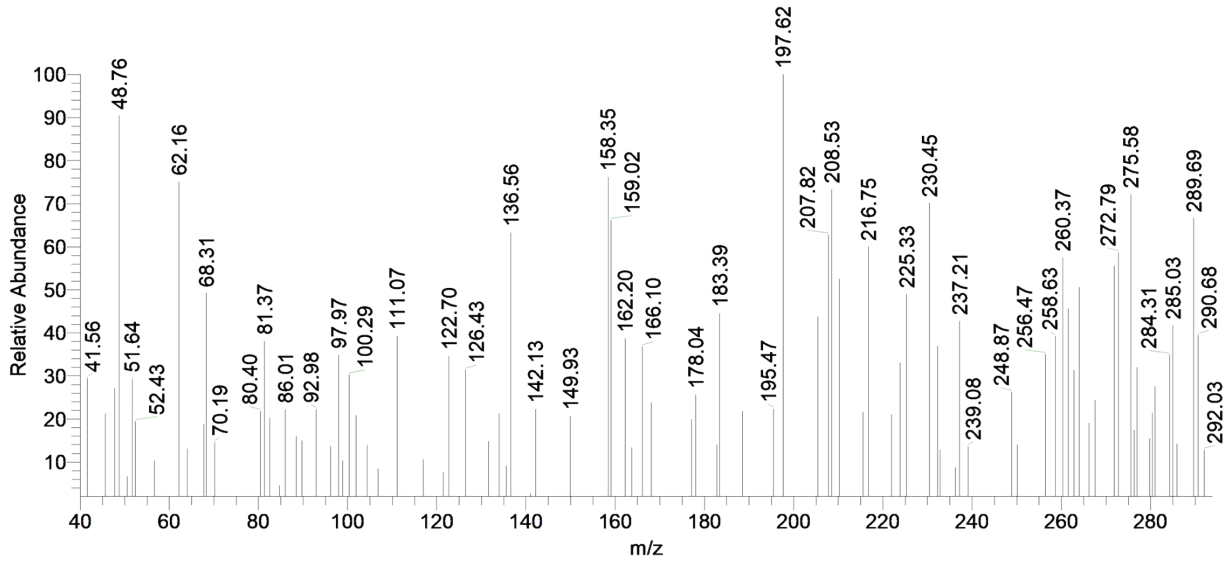

S56: Mass Results compound **10**

The Regional Center For mycology And Biotechnology  
RCMB

RT: 2.36 - 2.67 SM: 11B

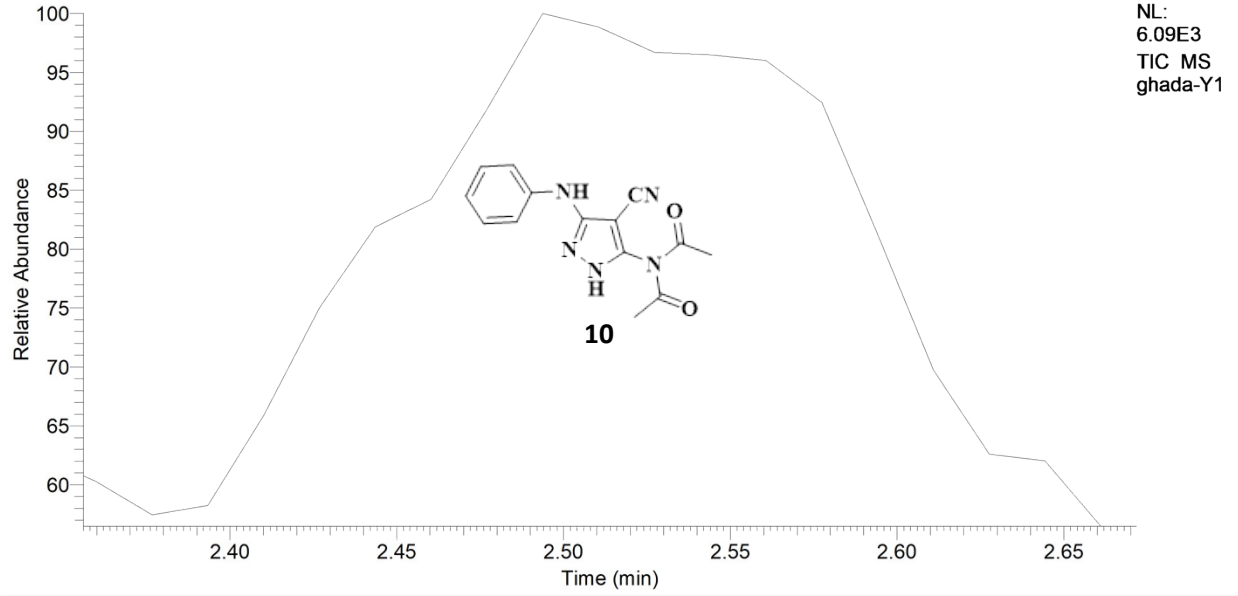

ghada-Y1 #159-163 RT: 2.68-2.74 AV: 5 SB: 26 1.21-1.34 , 0.87-1.14 NL: 6.51E1  
T: + c EI Full ms [40.00-1000.00]

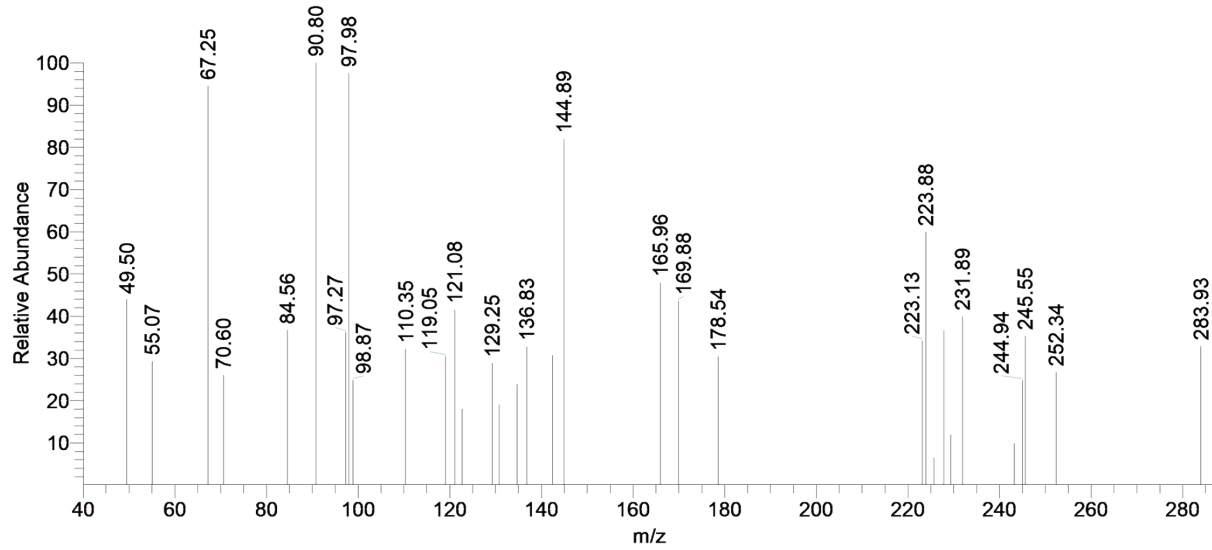

Supplement: d4ra06500j1.pdf [file d4ra06500j1.pdf]
